# Supplementary material
Source: PubMed Central journal article supplement (PMC7153488)
Supplement: JHM0420_219_suppl.pdf [file JHM0420_219_suppl.pdf]

**Factors associated with differential readmission diagnoses following acute  
exacerbations of COPD**

**Online Data Supplement**

**Authors and Affiliations:**

Russell G. Buhr, MD, PhD<sup>1,2,3</sup>, Nicholas J. Jackson, PhD, MPH<sup>4</sup>, Steven M. Dubinett, MD<sup>1,3</sup>, Gerald F. Kominski, PhD<sup>2,5</sup>, Carol M. Mangione, MD, MSPH<sup>2,6</sup> §, Michael K. Ong, MD, PhD<sup>2,3,6</sup> §

1. Division of Pulmonary and Critical Care Medicine, David Geffen School of Medicine, University of California, Los Angeles, Los Angeles, California, USA
  2. Department of Health Policy and Management, Jonathan and Karin Fielding School of Public Health, University of California, Los Angeles, California, Los Angeles, California, USA
  3. Medical Service, Greater Los Angeles Veterans Affairs Healthcare System, Los Angeles, California, USA
  4. Department of Medicine Statistics Core, University of California, Los Angeles, California, Los Angeles, California, USA
  5. Center for Health Policy Research, Jonathan and Karin Fielding School of Public Health, University of California, Los Angeles, California, Los Angeles, California, USA
  6. Division of General Internal Medicine and Health Services Research, David Geffen School of Medicine, University of California, Los Angeles, California, Los Angeles, California, USA
- § denotes co-senior authors

**Corresponding Author:**

Russell G. Buhr, MD, PhD  
Division of Pulmonary and Critical Care Medicine  
David Geffen School of Medicine, University of California, Los Angeles  
1100 Glendon Ave, Suite 850  
Los Angeles, California 90024  
Tel: 310-267-2614; Fax: 310-206-8622  
rbuhr@mednet.ucla.edu

## **Supplementary Methods:**

### *Database Construction*

Data from 2010 to 2016 from Nationwide Readmissions Database (NRD) were obtained and combined to form a pooled dataset for the analysis <sup>1</sup>. The NRD is maintained by the Agency for Healthcare Research and Quality's Healthcare Cost and Utilization Project, and aggregates data from the State Inpatient Databases from participating states <sup>2</sup>. The included states are nationally distributed across all regions but do vary from year to year. The NRD includes linkage numbers within a given year that can be used to track an individual patient across multiple hospitals in order to facilitate readmission analyses. The limitation, however, is that these numbers are only valid within each given year, and do not translate across state lines. As such, the data is constructed with a pooled, multiple cross-sectional approach rather than truly longitudinal. Only inpatient hospital discharges from acute care hospitals are included in the database.

### *Detailed Inclusion and Exclusion Criteria*

The aggregated NRD contains approximately 105 million observations from January 2010 to December 2016. We used the HRRP methodology reports as a template to structure inclusion and exclusion criteria, as outlined in the main text. Specific ICD-9 and ICD-10 codes used to define COPD hospitalizations follow in Appendix Tables 1 and 2 <sup>3,4</sup>. We adapted the HRRP criteria to also exclude those who underwent lung transplantation, recognizing that this population is fundamentally different than the general COPD population. We otherwise included those aged 40 and older discharged alive and not against medical advice as outlined in the main body. To

qualify as a new qualifying index admission, at least 30 days must have elapsed since the most recent hospitalization (i.e., HRRP does not count cascading readmissions as new events until a period of at least 30 days has elapsed)<sup>3,4</sup>. As such, we excluded those admitted in January, given we could not be assured they were not actually readmissions from the previous December, and because of database limitations in tracking patients across state lines<sup>2</sup>, admissions where a patient was not a resident of the state of hospitalization were excluded to minimize loss to follow up.

### *Readmission Specifications*

A readmission was defined by return to hospital for any reason within 30 days of an eligible discharge. The HRRP makes exceptions for planned (e.g., organ transplantation) and potentially planned readmissions (e.g., elective surgeries).

Appendix Figure 11 outlines a flow diagram adapted from HRRP documentation about how these determinations are made. The exhaustive list of included diagnosis codes can be found in the HRRP documentation<sup>3,4</sup>. In our particular analysis, we further divided the readmitted patients into two sub-groups, those readmitted for what would have qualified as a COPD hospitalization under HRRP guidelines (as above) and those readmitted for all other reasons.

### *Key Variable Specifications*

We used comorbidity as our primary predictor in our models, operationalized by the Elixhauser comorbidity index's most recent revision, which includes weighting for readmissions<sup>5</sup>. We modified a pre-existing Stata macro<sup>6</sup> to tabulate comorbidities from the ICD and DRG codes found in the database, using SAS code developed by AHRQ<sup>7</sup>. Within hospitals, we tabulated volume of all-cause and COPD-specific hospitalizations.

As a proxy for safety-net hospitals, we tabulated the proportion of within-hospital annual patient-days paid by Medicaid. Regarding payer coding, the NRD codes those with both Medicare and secondary insurance (whether dual-eligible Medicaid, or private plans like Medicare Advantage) as Medicare, and those with Medicaid and private insurance (managed Medicaid) as Medicaid <sup>2</sup>. Variables otherwise came pre-supplied in the database and details can be found in the database documentation <sup>2</sup>.

### *Survey Weights*

The NRD comes with pre-supplied sample weights to approximate a nationally representative population. Complete details on how the weights were derived are found in the database documentation, but to summarize, inverse probability weights were calculated using data from the American Hospital Association surveys to form strata on hospital types and patient characteristics (binned age groups and sex) <sup>2</sup>. The weight was applied during our analyses to ensure that the sample provided nationally representative estimates.

### *Modeling*

We fit a mixed-effects multinomial logistic regression model to estimate the beta coefficients on a log odds scale for the variables of interest on multiple categorical outcomes, an extension of logistic regression where more than two outcomes are allowed. In our particular modeling approach, we had three outcomes, those not readmitted (reference), those readmitted within 30 days for a return COPD diagnosis (as defined above), and those readmitted within 30 days for any other reason. Because of the clustered nature of the data, we used random intercepts for hospital clusters.

Generalized structural equation modeling was used to construct this regression model, which does not have a prespecified command for its execution in Stata version 15.1.

In sensitivity analyses, we used a Cox proportional hazards model, incorporating time to readmission into the model, but reducing to only the two readmission outcomes, as are the limitations for this modeling technique. In this model, the beta coefficient represents the odds of readmission for non-COPD diagnoses when compared to odds of readmission for a return COPD diagnosis. Because this model did not provide significantly different proportional effect sizes or directions compared to the multinomial model, we only included the multinomial model in the main results, though the Cox results can be found below in Appendix Table 10.

We also evaluated the sensitivity of using the HRRP ICD code classification to separate into readmissions for COPD versus readmissions for other conditions by liberalizing our outcomes into readmissions for respiratory condition DRGs versus readmissions for other DRGs. In our data, DRG versions 27 through 34 were represented, and we confirmed that the range of respiratory DRGs (163 through 208) was consistent across all of the versions included in our data. We chose the more restrictive HRRP definition in the end due to consistency with the HRRP definition, recognizing that the HRRP's objective is to improve quality of care in penalized conditions, in this case, COPD.

*Appendix Table 1: ICD-9 Diagnostic Codes for COPD for admissions prior to 10/1/2015*

| Code    | Description                                                                                                                                                                                                        |
|---------|--------------------------------------------------------------------------------------------------------------------------------------------------------------------------------------------------------------------|
| 491.21  | Obstructive chronic bronchitis; With (acute) exacerbation; acute exacerbation of COPD, decompensated COPD, decompensated COPD with exacerbation                                                                    |
| 491.22  | Obstructive chronic bronchitis; with acute bronchitis                                                                                                                                                              |
| 491.8   | Other chronic bronchitis. Chronic: tracheitis, tracheobronchitis.                                                                                                                                                  |
| 491.9   | Unspecified chronic bronchitis                                                                                                                                                                                     |
| 492.8   | Other emphysema; emphysema (lung or pulmonary): NOS, centriacinar, centrilobular, obstructive, panacinar, panlobular, unilateral, vesicular. MacLeod's syndrome; Swyer-James syndrome; unilateral hyperlucent lung |
| 493.20  | Chronic obstructive asthma; asthma with COPD, chronic asthmatic bronchitis, unspecified                                                                                                                            |
| 493.21  | Chronic obstructive asthma; asthma with COPD, chronic asthmatic bronchitis, with status asthmaticus                                                                                                                |
| 493.22  | Chronic obstructive asthma; asthma with COPD, chronic asthmatic bronchitis, with (acute) exacerbation                                                                                                              |
| 496     | Chronic: nonspecific lung disease, obstructive lung disease, obstructive pulmonary disease (COPD) NOS                                                                                                              |
| 518.81* | Other diseases of lung; acute respiratory failure; respiratory failure NOS                                                                                                                                         |
| 518.82* | Other diseases of lung; acute respiratory failure; other pulmonary insufficiency, acute respiratory distress                                                                                                       |
| 518.84* | Other diseases of lung; acute respiratory failure; acute & chronic respiratory failure                                                                                                                             |
| 799.1*  | Other ill-defined & unknown causes of morbidity & mortality; respiratory arrest, cardiorespiratory failure                                                                                                         |

*\*Principal diagnosis when combined with secondary diagnosis of AECOPD (491.21, 491.22, 493.21, or 493.22). Excluded if concomitant diagnosis of lung or heart/lung transplantation (procedure codes 33.50, 33.51, 33.52, 33.6, or diagnosis code V42.6). Adapted from HRRP methodology report <sup>3</sup>.*

*Appendix Table 2: ICD-10 Diagnostic Codes for COPD for admissions on or after 10/1/2015*

| Code    | Description                                                                            |
|---------|----------------------------------------------------------------------------------------|
| J41.8   | Mixed simple and mucopurulent chronic bronchitis                                       |
| J42     | Unspecified chronic bronchitis                                                         |
| J43.0   | Unilateral pulmonary emphysema [MacLeod's syndrome]                                    |
| J43.1   | Panlobular emphysema                                                                   |
| J43.2   | Centrilobular emphysema                                                                |
| J43.8   | Other emphysema                                                                        |
| J43.9   | Emphysema, unspecified                                                                 |
| J44.0   | Chronic obstructive pulmonary disease with acute lower respiratory infection           |
| J44.1   | Chronic obstructive pulmonary disease with (acute) exacerbation                        |
| J44.9   | Chronic obstructive pulmonary disease, unspecified                                     |
| J96.00* | Acute respiratory failure, unspecified whether hypoxia or hypercapnia                  |
| J96.01* | Acute respiratory failure with hypoxia                                                 |
| J96.02* | Acute respiratory failure with hypercapnia                                             |
| J96.20* | Acute and chronic respiratory failure, unspecified whether with hypoxia or hypercapnia |
| J96.21* | Acute and chronic respiratory failure with hypoxia                                     |
| J96.22* | Acute and chronic respiratory failure with hypercapnia                                 |
| J96.90* | Respiratory failure, unspecified, unspecified whether with hypoxia or hypercapnia      |
| J96.91* | Respiratory failure, unspecified with hypoxia                                          |
| J96.92* | Respiratory failure, unspecified with hypercapnia                                      |
| R09.2*  | Respiratory arrest                                                                     |

*\*Principal diagnosis when combined with secondary diagnosis of AECOPD (J44.0 or J44.1).*

*Excluded if concomitant diagnosis of lung or heart/lung transplantation (procedure codes 0BYC0Z0, 0BYC0Z1, 0BYC0Z2, 0BYD0Z0, 0BYZD0Z1, 0BYD0Z2, 0BYZF0Z0, 0BYZF0Z1, 0BYF0Z2, 0BYG0Z0, 0BYG0Z1, 0BYG0Z2, 0BYH0Z0, 0BYH0Z1, 0BYH0Z2, 0BYJ0Z0, 0BYJ0Z1, 0BYJ0Z2, 0BYK0Z0, 0BYK0Z1, 0BYK0Z2, 0BYL0Z0, 0BYL0Z1, 0BYL0Z2, 0BYM0Z0, 0BYM0Z1, 0BYM0Z2 or diagnosis codes Z94.2 or Z94.3). Adapted from HRRP methodology report <sup>4</sup>.*

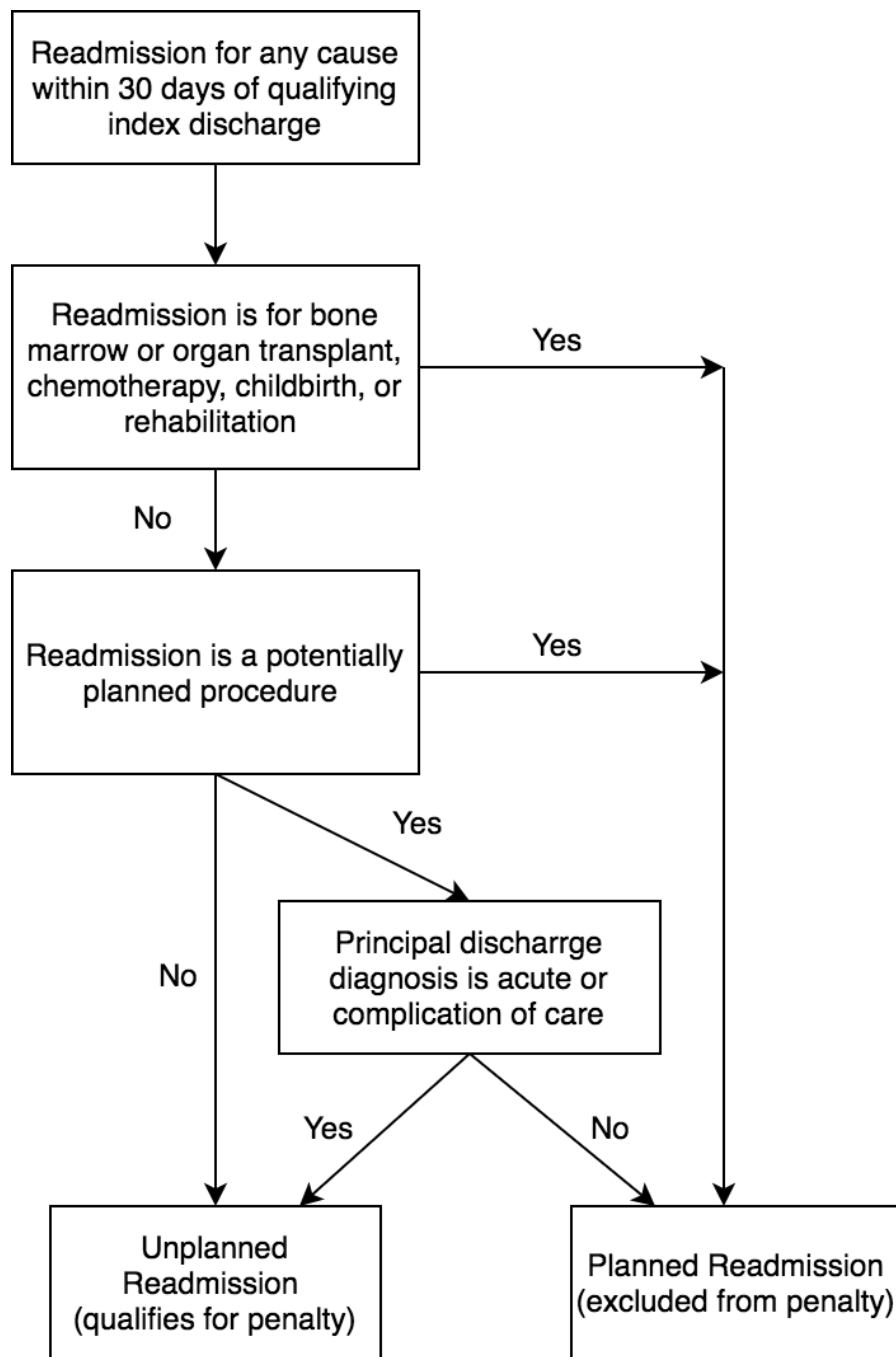

*Appendix Figure 1: Published HRRP schema for excluding planned readmissions from the analysis. Figure adapted from Yale New Haven HRRP Methodology Reports, where diagnosis and procedure codes for exceptions can be found <sup>3,4</sup>*



*Appendix Table 3: Comorbidity characteristics of the aggregated cohort, comparing COPD and Non-COPD related readmissions to non-readmitted patients in index stays.*

|                                                | <b>Not<br/>Readmitted</b><br>N=1,375,099 | <b>Non-COPD<br/>Readmitted</b><br>N=159,675 | <b>COPD<br/>Readmitted</b><br>N=128,209 | <b>P</b> |
|------------------------------------------------|------------------------------------------|---------------------------------------------|-----------------------------------------|----------|
| <b>Elixhauser Readmission Index, Mean ± SD</b> | 16.3 ± 14.7                              | 22.8 ± 16.4                                 | 17.8 ± 14.9                             | <.001    |
| <b>Elixhauser Domain Count, Mean ± SD</b>      | 3.92 ± 1.81                              | 4.62 ± 1.93                                 | 4.05 ± 1.84                             | <.001    |
| <b>Elixhauser Component Comorbidities, %</b>   |                                          |                                             |                                         |          |
| Congestive heart failure                       | 25.4%                                    | 38.6%                                       | 28.3%                                   | <.001    |
| Valvular heart disease                         | 6.2%                                     | 9.1%                                        | 5.6%                                    | <.001    |
| Pulmonary circulation disorders                | 7.6%                                     | 10.4%                                       | 9.0%                                    | <.001    |
| Peripheral vascular disease                    | 7.7%                                     | 10.4%                                       | 7.6%                                    | <.001    |
| Hypertension (complicated + uncomplicated)     | 54.5%                                    | 50.0%                                       | 54.9%                                   | <.001    |
| Paralysis                                      | 1.2%                                     | 1.9%                                        | 1.1%                                    | <.001    |
| Other neurologic disorders                     | 8.3%                                     | 10.5%                                       | 8.9%                                    | <.001    |
| Chronic pulmonary disease                      | 100.0%                                   | 100.0%                                      | 100.0%                                  | ---      |
| Diabetes mellitus (uncomplicated)              | 25.8%                                    | 29.2%                                       | 27.4%                                   | <.001    |
| Diabetes mellitus (complicated)                | 5.7%                                     | 8.4%                                        | 5.9%                                    | <.001    |
| Hypothyroidism                                 | 13.6%                                    | 15.3%                                       | 12.5%                                   | <.001    |
| Renal failure                                  | 12.3%                                    | 21.5%                                       | 11.8%                                   | <.001    |
| Liver disease                                  | 2.3%                                     | 3.2%                                        | 2.4%                                    | <.001    |
| Peptic ulcer disease                           | 0.1%                                     | 0.2%                                        | 0.1%                                    | 0.062    |
| HIV/AIDS                                       | 0.2%                                     | 0.3%                                        | 0.3%                                    | <.001    |
| Lymphoma                                       | 0.5%                                     | 0.8%                                        | 0.5%                                    | <.001    |
| Metastatic cancer                              | 1.0%                                     | 2.2%                                        | 1.0%                                    | <.001    |
| Solid tumor without metastasis                 | 3.1%                                     | 5.5%                                        | 3.6%                                    | <.001    |
| RA/collagen vascular disorders                 | 3.3%                                     | 3.9%                                        | 3.0%                                    | <.001    |
| Coagulopathy                                   | 3.1%                                     | 4.5%                                        | 3.0%                                    | <.001    |
| Obesity                                        | 19.0%                                    | 19.9%                                       | 19.3%                                   | <.001    |
| Weight loss                                    | 4.5%                                     | 5.7%                                        | 4.9%                                    | <.001    |
| Fluid and electrolyte disorders                | 27.4%                                    | 33.2%                                       | 28.0%                                   | <.001    |
| Blood loss anemia                              | 0.3%                                     | 0.6%                                        | 0.3%                                    | <.001    |
| Deficiency anemia                              | 14.4%                                    | 22.3%                                       | 17.0%                                   | <.001    |
| Alcohol abuse                                  | 4.5%                                     | 4.7%                                        | 4.9%                                    | <.001    |
| Drug abuse                                     | 3.5%                                     | 3.9%                                        | 4.7%                                    | <.001    |
| Psychoses                                      | 6.1%                                     | 7.4%                                        | 7.8%                                    | <.001    |
| Depression                                     | 16.7%                                    | 17.0%                                       | 18.7%                                   | <.001    |

Note: Unweighted N's displayed. Frequencies derived using weighted analysis.

Appendix Table 4: Top 20 Diagnosis Related Groups (DRGs) for non-COPD related readmissions

| Rank | Diagnosis Related Group                                                                                                 | %     |
|------|-------------------------------------------------------------------------------------------------------------------------|-------|
| 1    | 871: Septicemia or severe sepsis without mechanical ventilation for > 96 hours with major complication or comorbidity   | 7.8%  |
| 2    | 291: Heart failure and shock with major complication or comorbidity                                                     | 5.6%  |
| 3    | 193: Simple pneumonia and pleurisy with major complication or comorbidity                                               | 5.4%  |
| 4    | 194: Simple pneumonia and pleurisy with complication or comorbidity                                                     | 4.2%  |
| 5    | 292: Heart failure and shock with complication or comorbidity                                                           | 3.5%  |
| 6    | 177: Respiratory infections and inflammations with major complication or comorbidity                                    | 2.5%  |
| 7    | 392: Esophagitis, gastroenteritis, and miscellaneous digestive disorders without major comorbidity or complication      | 2.4%  |
| 8    | 178: Respiratory infections and inflammations with complication or comorbidity                                          | 1.7%  |
| 9    | 309: Cardiac arrhythmia and conduction disorders with complication or comorbidity                                       | 1.6%  |
| 10   | 885: Psychoses                                                                                                          | 1.5%  |
| 11   | 683: Renal failure with comorbidity or complication                                                                     | 1.5%  |
| 12   | 313: Chest pain                                                                                                         | 1.5%  |
| 13   | 378: Gastrointestinal hemorrhage with comorbidity or complication                                                       | 1.4%  |
| 14   | 641: Miscellaneous disorders of nutrition, metabolism, or fluids/electrolytes without major comorbidity or complication | 1.4%  |
| 15   | 603: Cellulitis without major comorbidity or complication                                                               | 1.4%  |
| 16   | 189: Pulmonary edema and respiratory failure                                                                            | 1.2%  |
| 17   | 308: Cardiac arrhythmia and conduction disorders with major complication or comorbidity                                 | 1.2%  |
| 18   | 682: Renal failure with major comorbidity or complication                                                               | 1.2%  |
| 19   | 312: Syncope and collapse                                                                                               | 1.2%  |
| 20   | All Others                                                                                                              | 51.5% |

Appendix Table 5: Top 10 DRGs, COPD readmissions by HRRP Criteria

| DRG Rank | 2010                                                                 |        | 2011                                                                 |        | 2012                                                                 |        | 2013                                                                 |        | 2014                                                                 |        | 2015                                                                 |        | 2016                                                                 |        |
|----------|----------------------------------------------------------------------|--------|----------------------------------------------------------------------|--------|----------------------------------------------------------------------|--------|----------------------------------------------------------------------|--------|----------------------------------------------------------------------|--------|----------------------------------------------------------------------|--------|----------------------------------------------------------------------|--------|
|          | Dx                                                                   | %      |
| 1        | 191: CHRONIC OBSTRUCTIVE PULMONARY DISEASE W CC                      | 25.70% | 191: CHRONIC OBSTRUCTIVE PULMONARY DISEASE W CC                      | 26.80% | 191: CHRONIC OBSTRUCTIVE PULMONARY DISEASE W CC                      | 26.00% | 191: CHRONIC OBSTRUCTIVE PULMONARY DISEASE W CC                      | 25.60% | 190: CHRONIC OBSTRUCTIVE PULMONARY DISEASE W MCC                     | 26.40% | 190: CHRONIC OBSTRUCTIVE PULMONARY DISEASE W MCC                     | 27.40% | 190: CHRONIC OBSTRUCTIVE PULMONARY DISEASE W MCC                     | 30.40% |
| 2        | 192: CHRONIC OBSTRUCTIVE PULMONARY DISEASE W/O CC/MCC                | 24.70% | 190: CHRONIC OBSTRUCTIVE PULMONARY DISEASE W MCC                     | 24.30% | 190: CHRONIC OBSTRUCTIVE PULMONARY DISEASE W MCC                     | 24.50% | 190: CHRONIC OBSTRUCTIVE PULMONARY DISEASE W MCC                     | 25.40% | 191: CHRONIC OBSTRUCTIVE PULMONARY DISEASE W CC                      | 24.50% | 189: PULMONARY EDEMA & RESPIRATORY FAILURE                           | 25.60% | 189: PULMONARY EDEMA & RESPIRATORY FAILURE                           | 28.30% |
| 3        | 190: CHRONIC OBSTRUCTIVE PULMONARY DISEASE W MCC                     | 23.60% | 192: CHRONIC OBSTRUCTIVE PULMONARY DISEASE W/O CC/MCC                | 22.40% | 192: CHRONIC OBSTRUCTIVE PULMONARY DISEASE W/O CC/MCC                | 20.70% | 189: PULMONARY EDEMA & RESPIRATORY FAILURE                           | 20.70% | 189: PULMONARY EDEMA & RESPIRATORY FAILURE                           | 23.00% | 191: CHRONIC OBSTRUCTIVE PULMONARY DISEASE W CC                      | 24.00% | 191: CHRONIC OBSTRUCTIVE PULMONARY DISEASE W CC                      | 21.20% |
| 4        | 189: PULMONARY EDEMA & RESPIRATORY FAILURE                           | 16.10% | 189: PULMONARY EDEMA & RESPIRATORY FAILURE                           | 17.20% | 189: PULMONARY EDEMA & RESPIRATORY FAILURE                           | 18.80% | 192: CHRONIC OBSTRUCTIVE PULMONARY DISEASE W/O CC/MCC                | 18.50% | 192: CHRONIC OBSTRUCTIVE PULMONARY DISEASE W/O CC/MCC                | 16.40% | 192: CHRONIC OBSTRUCTIVE PULMONARY DISEASE W/O CC/MCC                | 13.30% | 192: CHRONIC OBSTRUCTIVE PULMONARY DISEASE W/O CC/MCC                | 10.20% |
| 5        | 208: RESPIRATORY SYSTEM DIAGNOSIS W VENTILATOR SUPPORT <96 HOURS     | 5.40%  | 208: RESPIRATORY SYSTEM DIAGNOSIS W VENTILATOR SUPPORT <96 HOURS     | 5.30%  | 208: RESPIRATORY SYSTEM DIAGNOSIS W VENTILATOR SUPPORT <96 HOURS     | 6.30%  | 208: RESPIRATORY SYSTEM DIAGNOSIS W VENTILATOR SUPPORT <96 HOURS     | 6.30%  | 208: RESPIRATORY SYSTEM DIAGNOSIS W VENTILATOR SUPPORT <96 HOURS     | 6.20%  | 208: RESPIRATORY SYSTEM DIAGNOSIS W VENTILATOR SUPPORT <96 HOURS     | 6.00%  | 208: RESPIRATORY SYSTEM DIAGNOSIS W VENTILATOR SUPPORT <96 HOURS     | 6.30%  |
| 6        | 207: RESPIRATORY SYSTEM DIAGNOSIS W VENTILATOR SUPPORT >96 HOURS     | 2.30%  | 207: RESPIRATORY SYSTEM DIAGNOSIS W VENTILATOR SUPPORT >96 HOURS     | 2.10%  | 207: RESPIRATORY SYSTEM DIAGNOSIS W VENTILATOR SUPPORT >96 HOURS     | 1.80%  | 207: RESPIRATORY SYSTEM DIAGNOSIS W VENTILATOR SUPPORT >96 HOURS     | 1.70%  | 207: RESPIRATORY SYSTEM DIAGNOSIS W VENTILATOR SUPPORT >96 HOURS     | 1.70%  | 207: RESPIRATORY SYSTEM DIAGNOSIS W VENTILATOR SUPPORT >96 HOURS     | 1.70%  | 207: RESPIRATORY SYSTEM DIAGNOSIS W VENTILATOR SUPPORT >96 HOURS     | 1.60%  |
| 7        | 4: TRACH W MV >96 HRS OR PDX EXC FACE, MOUTH & NECK W/O MAJ O.R.     | 0.60%  | 4: TRACH W MV >96 HRS OR PDX EXC FACE, MOUTH & NECK W/O MAJ O.R.     | 0.50%  | 4: TRACH W MV >96 HRS OR PDX EXC FACE, MOUTH & NECK W/O MAJ O.R.     | 0.50%  | 4: TRACH W MV >96 HRS OR PDX EXC FACE, MOUTH & NECK W/O MAJ O.R.     | 0.60%  | 4: TRACH W MV >96 HRS OR PDX EXC FACE, MOUTH & NECK W/O MAJ O.R.     | 0.40%  | 4: TRACH W MV >96 HRS OR PDX EXC FACE, MOUTH & NECK W/O MAJ O.R.     | 0.50%  | 166: OTHER RESP SYSTEM O.R. PROCEDURES W MCC                         | 0.50%  |
| 8        | 166: OTHER RESP SYSTEM O.R. PROCEDURES W MCC                         | 0.50%  | 981: EXTENSIVE O.R. PROCEDURE UNRELATED TO PRINCIPAL DIAGNOSIS W MCC | 0.30%  | 981: EXTENSIVE O.R. PROCEDURE UNRELATED TO PRINCIPAL DIAGNOSIS W MCC | 0.30%  | 981: EXTENSIVE O.R. PROCEDURE UNRELATED TO PRINCIPAL DIAGNOSIS W MCC | 0.40%  | 166: OTHER RESP SYSTEM O.R. PROCEDURES W MCC                         | 0.40%  | 166: OTHER RESP SYSTEM O.R. PROCEDURES W MCC                         | 0.40%  | 4: TRACH W MV >96 HRS OR PDX EXC FACE, MOUTH & NECK W/O MAJ O.R.     | 0.50%  |
| 9        | 981: EXTENSIVE O.R. PROCEDURE UNRELATED TO PRINCIPAL DIAGNOSIS W MCC | 0.30%  | 166: OTHER RESP SYSTEM O.R. PROCEDURES W MCC                         | 0.30%  | 166: OTHER RESP SYSTEM O.R. PROCEDURES W MCC                         | 0.30%  | 166: OTHER RESP SYSTEM O.R. PROCEDURES W MCC                         | 0.40%  | 981: EXTENSIVE O.R. PROCEDURE UNRELATED TO PRINCIPAL DIAGNOSIS W MCC | 0.20%  | 981: EXTENSIVE O.R. PROCEDURE UNRELATED TO PRINCIPAL DIAGNOSIS W MCC | 0.30%  | 981: EXTENSIVE O.R. PROCEDURE UNRELATED TO PRINCIPAL DIAGNOSIS W MCC | 0.30%  |
| 10       | 999: UNGROUPABLE                                                     | 0.20%  | 999: UNGROUPABLE                                                     | 0.20%  | 999: UNGROUPABLE                                                     | 0.10%  | 999: UNGROUPABLE                                                     | 0.20%  | 999: UNGROUPABLE                                                     | 0.20%  | 167: OTHER RESP SYSTEM O.R. PROCEDURES W CC                          | 0.10%  | 163: MAJOR CHEST PROCEDURES W MCC                                    | 0.20%  |

Appendix Table 6: Top 10 DRGs, non-COPD readmissions by HRRP Criteria

| DRG Rank | 2010                                                        |      | 2011                                                        |      | 2012                                                        |      | 2013                                                        |      | 2014                                                        |      | 2015                                                        |       | 2016                                                        |       |
|----------|-------------------------------------------------------------|------|-------------------------------------------------------------|------|-------------------------------------------------------------|------|-------------------------------------------------------------|------|-------------------------------------------------------------|------|-------------------------------------------------------------|-------|-------------------------------------------------------------|-------|
|          | Dx                                                          | %     | Dx                                                          | %     |
| 1        | 194: SIMPLE PNEUMONIA & PLEURISY W CC                       | 5.1% | 871: SEPTICEMIA OR SEVERE SEPSIS W/O MV >96 HOURS W MCC     | 5.6% | 871: SEPTICEMIA OR SEVERE SEPSIS W/O MV >96 HOURS W MCC     | 6.3% | 871: SEPTICEMIA OR SEVERE SEPSIS W/O MV >96 HOURS W MCC     | 7.8% | 871: SEPTICEMIA OR SEVERE SEPSIS W/O MV >96 HOURS W MCC     | 8.9% | 871: SEPTICEMIA OR SEVERE SEPSIS W/O MV >96 HOURS W MCC     | 10.4% | 871: SEPTICEMIA OR SEVERE SEPSIS W/O MV >96 HOURS W MCC     | 11.3% |
| 2        | 871: SEPTICEMIA OR SEVERE SEPSIS W/O MV >96 HOURS W MCC     | 5.0% | 193: SIMPLE PNEUMONIA & PLEURISY W MCC                      | 5.2% | 193: SIMPLE PNEUMONIA & PLEURISY W MCC                      | 5.5% | 193: SIMPLE PNEUMONIA & PLEURISY W MCC                      | 5.7% | 291: HEART FAILURE & SHOCK W MCC                            | 6.1% | 291: HEART FAILURE & SHOCK W MCC                            | 6.6%  | 291: HEART FAILURE & SHOCK W MCC                            | 7.9%  |
| 3        | 193: SIMPLE PNEUMONIA & PLEURISY W MCC                      | 4.9% | 194: SIMPLE PNEUMONIA & PLEURISY W CC                       | 5.1% | 291: HEART FAILURE & SHOCK W MCC                            | 4.8% | 291: HEART FAILURE & SHOCK W MCC                            | 5.5% | 193: SIMPLE PNEUMONIA & PLEURISY W MCC                      | 5.5% | 193: SIMPLE PNEUMONIA & PLEURISY W MCC                      | 5.7%  | 193: SIMPLE PNEUMONIA & PLEURISY W MCC                      | 5.4%  |
| 4        | 291: HEART FAILURE & SHOCK W MCC                            | 4.4% | 291: HEART FAILURE & SHOCK W MCC                            | 4.4% | 194: SIMPLE PNEUMONIA & PLEURISY W CC                       | 4.4% | 194: SIMPLE PNEUMONIA & PLEURISY W CC                       | 4.4% | 194: SIMPLE PNEUMONIA & PLEURISY W CC                       | 4.0% | 292: HEART FAILURE & SHOCK W CC                             | 3.5%  | 292: HEART FAILURE & SHOCK W CC                             | 3.2%  |
| 5        | 292: HEART FAILURE & SHOCK W CC                             | 3.4% | 292: HEART FAILURE & SHOCK W CC                             | 3.7% | 292: HEART FAILURE & SHOCK W CC                             | 3.8% | 292: HEART FAILURE & SHOCK W CC                             | 3.5% | 292: HEART FAILURE & SHOCK W CC                             | 3.6% | 194: SIMPLE PNEUMONIA & PLEURISY W CC                       | 3.3%  | 194: SIMPLE PNEUMONIA & PLEURISY W CC                       | 3.0%  |
| 6        | 392: ESOPHAGITIS, GASTROENT & MISC DIGEST DISORDERS W/O MCC | 2.7% | 392: ESOPHAGITIS, GASTROENT & MISC DIGEST DISORDERS W/O MCC | 2.9% | 392: ESOPHAGITIS, GASTROENT & MISC DIGEST DISORDERS W/O MCC | 2.6% | 177: RESPIRATORY INFECTIONS & INFLAMMATION S W MCC          | 2.5% | 177: RESPIRATORY INFECTIONS & INFLAMMATIONS W MCC           | 2.5% | 177: RESPIRATORY INFECTIONS & INFLAMMATIONS W MCC           | 2.6%  | 177: RESPIRATORY INFECTIONS & INFLAMMATIONS W MCC           | 2.6%  |
| 7        | 177: RESPIRATORY INFECTIONS & INFLAMMATIONS W MCC           | 2.4% | 177: RESPIRATORY INFECTIONS & INFLAMMATION S W MCC          | 2.3% | 177: RESPIRATORY INFECTIONS & INFLAMMATION S W MCC          | 2.2% | 392: ESOPHAGITIS, GASTROENT & MISC DIGEST DISORDERS W/O MCC | 2.3% | 392: ESOPHAGITIS, GASTROENT & MISC DIGEST DISORDERS W/O MCC | 2.3% | 392: ESOPHAGITIS, GASTROENT & MISC DIGEST DISORDERS W/O MCC | 1.9%  | 392: ESOPHAGITIS, GASTROENT & MISC DIGEST DISORDERS W/O MCC | 1.8%  |
| 8        | 178: RESPIRATORY INFECTIONS & INFLAMMATIONS W CC            | 2.2% | 178: RESPIRATORY INFECTIONS & INFLAMMATION S W CC           | 2.0% | 178: RESPIRATORY INFECTIONS & INFLAMMATION S W CC           | 1.8% | 885: PSYCHOSES                                              | 1.7% | 309: CARDIAC ARRHYTHMIA & CONDUCTION DISORDERS W CC         | 1.7% | 309: CARDIAC ARRHYTHMIA & CONDUCTION DISORDERS W CC         | 1.6%  | 683: RENAL FAILURE W CC                                     | 1.5%  |
| 9        | 313: CHEST PAIN                                             | 2.0% | 313: CHEST PAIN                                             | 2.0% | 378: G.I. HEMORRHAGE W CC                                   | 1.7% | 683: RENAL FAILURE W CC                                     | 1.7% | 683: RENAL FAILURE W CC                                     | 1.6% | 683: RENAL FAILURE W CC                                     | 1.6%  | 309: CARDIAC ARRHYTHMIA & CONDUCTION DISORDERS W CC         | 1.5%  |
| 10       | 885: PSYCHOSES                                              | 1.8% | 885: PSYCHOSES                                              | 1.7% | 683: RENAL FAILURE W CC                                     | 1.6% | 309: CARDIAC ARRHYTHMIA & CONDUCTION DISORDERS W CC         | 1.7% | 178: RESPIRATORY INFECTIONS & INFLAMMATIONS W CC            | 1.6% | 378: G.I. HEMORRHAGE W CC                                   | 1.4%  | 682: RENAL FAILURE W MCC                                    | 1.4%  |

Appendix Table 7: Top 10 DRGs, respiratory readmissions by DRG criteria

| DRG Rank | 2010                                                             |       | 2011                                                             |       | 2012                                                             |       | 2013                                                             |       | 2014                                                             |       | 2015                                                             |       | 2016                                                             |       |
|----------|------------------------------------------------------------------|-------|------------------------------------------------------------------|-------|------------------------------------------------------------------|-------|------------------------------------------------------------------|-------|------------------------------------------------------------------|-------|------------------------------------------------------------------|-------|------------------------------------------------------------------|-------|
|          | Dx                                                               | %     |
| 1        | 191: CHRONIC OBSTRUCTIVE PULMONARY DISEASE W CC                  | 19.9% | 191: CHRONIC OBSTRUCTIVE PULMONARY DISEASE W CC                  | 20.8% | 191: CHRONIC OBSTRUCTIVE PULMONARY DISEASE W CC                  | 20.5% | 191: CHRONIC OBSTRUCTIVE PULMONARY DISEASE W CC                  | 20.0% | 190: CHRONIC OBSTRUCTIVE PULMONARY DISEASE W MCC                 | 20.5% | 190: CHRONIC OBSTRUCTIVE PULMONARY DISEASE W MCC                 | 21.5% | 190: CHRONIC OBSTRUCTIVE PULMONARY DISEASE W MCC                 | 24.0% |
| 2        | 192: CHRONIC OBSTRUCTIVE PULMONARY DISEASE W/O CC/MCC            | 19.1% | 190: CHRONIC OBSTRUCTIVE PULMONARY DISEASE W MCC                 | 18.8% | 190: CHRONIC OBSTRUCTIVE PULMONARY DISEASE W MCC                 | 19.1% | 190: CHRONIC OBSTRUCTIVE PULMONARY DISEASE W MCC                 | 19.7% | 189: PULMONARY EDEMA & RESPIRATORY FAILURE                       | 19.3% | 189: PULMONARY EDEMA & RESPIRATORY FAILURE                       | 21.4% | 189: PULMONARY EDEMA & RESPIRATORY FAILURE                       | 23.4% |
| 3        | 190: CHRONIC OBSTRUCTIVE PULMONARY DISEASE W MCC                 | 18.3% | 192: CHRONIC OBSTRUCTIVE PULMONARY DISEASE W/O CC/MCC            | 17.3% | 192: CHRONIC OBSTRUCTIVE PULMONARY DISEASE W/O CC/MCC            | 16.2% | 189: PULMONARY EDEMA & RESPIRATORY FAILURE                       | 17.1% | 191: CHRONIC OBSTRUCTIVE PULMONARY DISEASE W CC                  | 19.2% | 191: CHRONIC OBSTRUCTIVE PULMONARY DISEASE W CC                  | 18.9% | 191: CHRONIC OBSTRUCTIVE PULMONARY DISEASE W CC                  | 16.8% |
| 4        | 189: PULMONARY EDEMA & RESPIRATORY FAILURE                       | 13.3% | 189: PULMONARY EDEMA & RESPIRATORY FAILURE                       | 14.2% | 189: PULMONARY EDEMA & RESPIRATORY FAILURE                       | 15.5% | 192: CHRONIC OBSTRUCTIVE PULMONARY DISEASE W/O CC/MCC            | 14.4% | 192: CHRONIC OBSTRUCTIVE PULMONARY DISEASE W/O CC/MCC            | 12.8% | 192: CHRONIC OBSTRUCTIVE PULMONARY DISEASE W/O CC/MCC            | 10.5% | 192: CHRONIC OBSTRUCTIVE PULMONARY DISEASE W/O CC/MCC            | 8.0%  |
| 5        | 208: RESPIRATORY SYSTEM DIAGNOSIS W VENTILATOR SUPPORT <96 HOURS | 5.0%  | 208: RESPIRATORY SYSTEM DIAGNOSIS W VENTILATOR SUPPORT <96 HOURS | 5.0%  | 208: RESPIRATORY SYSTEM DIAGNOSIS W VENTILATOR SUPPORT <96 HOURS | 5.8%  | 208: RESPIRATORY SYSTEM DIAGNOSIS W VENTILATOR SUPPORT <96 HOURS | 5.8%  | 208: RESPIRATORY SYSTEM DIAGNOSIS W VENTILATOR SUPPORT <96 HOURS | 5.7%  | 193: SIMPLE PNEUMONIA & PLEURISY W MCC                           | 5.7%  | 208: RESPIRATORY SYSTEM DIAGNOSIS W VENTILATOR SUPPORT <96 HOURS | 5.8%  |
| 6        | 194: SIMPLE PNEUMONIA & PLEURISY W CC                            | 4.9%  | 193: SIMPLE PNEUMONIA & PLEURISY W MCC                           | 4.9%  | 193: SIMPLE PNEUMONIA & PLEURISY W MCC                           | 5.2%  | 193: SIMPLE PNEUMONIA & PLEURISY W MCC                           | 5.5%  | 193: SIMPLE PNEUMONIA & PLEURISY W MCC                           | 5.3%  | 208: RESPIRATORY SYSTEM DIAGNOSIS W VENTILATOR SUPPORT <96 HOURS | 5.7%  | 193: SIMPLE PNEUMONIA & PLEURISY W MCC                           | 5.4%  |
| 7        | 193: SIMPLE PNEUMONIA & PLEURISY W MCC                           | 4.6%  | 194: SIMPLE PNEUMONIA & PLEURISY W CC                            | 4.8%  | 194: SIMPLE PNEUMONIA & PLEURISY W CC                            | 4.2%  | 194: SIMPLE PNEUMONIA & PLEURISY W CC                            | 4.2%  | 194: SIMPLE PNEUMONIA & PLEURISY W CC                            | 3.9%  | 194: SIMPLE PNEUMONIA & PLEURISY W CC                            | 3.3%  | 194: SIMPLE PNEUMONIA & PLEURISY W CC                            | 3.1%  |
| 8        | 177: RESPIRATORY INFECTIONS & INFLAMMATIONS W MCC                | 2.3%  | 177: RESPIRATORY INFECTIONS & INFLAMMATIONS W MCC                | 2.2%  | 177: RESPIRATORY INFECTIONS & INFLAMMATIONS W MCC                | 2.0%  | 177: RESPIRATORY INFECTIONS & INFLAMMATIONS W MCC                | 2.4%  | 177: RESPIRATORY INFECTIONS & INFLAMMATIONS W MCC                | 2.4%  | 177: RESPIRATORY INFECTIONS & INFLAMMATIONS W MCC                | 2.6%  | 177: RESPIRATORY INFECTIONS & INFLAMMATIONS W MCC                | 2.6%  |
| 9        | 207: RESPIRATORY SYSTEM DIAGNOSIS W VENTILATOR SUPPORT >96 HOURS | 2.3%  | 207: RESPIRATORY SYSTEM DIAGNOSIS W VENTILATOR SUPPORT >96 HOURS | 2.1%  | 207: RESPIRATORY SYSTEM DIAGNOSIS W VENTILATOR SUPPORT >96 HOURS | 1.9%  | 207: RESPIRATORY SYSTEM DIAGNOSIS W VENTILATOR SUPPORT >96 HOURS | 1.8%  | 207: RESPIRATORY SYSTEM DIAGNOSIS W VENTILATOR SUPPORT >96 HOURS | 1.8%  | 207: RESPIRATORY SYSTEM DIAGNOSIS W VENTILATOR SUPPORT >96 HOURS | 1.7%  | 207: RESPIRATORY SYSTEM DIAGNOSIS W VENTILATOR SUPPORT >96 HOURS | 1.5%  |
| 10       | 178: RESPIRATORY INFECTIONS & INFLAMMATIONS W CC                 | 2.1%  | 178: RESPIRATORY INFECTIONS & INFLAMMATIONS W CC                 | 1.9%  | 178: RESPIRATORY INFECTIONS & INFLAMMATIONS W CC                 | 1.7%  | 178: RESPIRATORY INFECTIONS & INFLAMMATIONS W CC                 | 1.5%  | 178: RESPIRATORY INFECTIONS & INFLAMMATIONS W CC                 | 1.5%  | 178: RESPIRATORY INFECTIONS & INFLAMMATIONS W CC                 | 1.3%  | 178: RESPIRATORY INFECTIONS & INFLAMMATIONS W CC                 | 1.1%  |

Appendix Table 8: Top 10 DRGs, non-respiratory readmissions by DRG criteria

| DRG Rank | 2010                                                                      |      | 2011                                                                       |      | 2012                                                                       |      | 2013                                                        |       | 2014                                                        |       | 2015                                                                       |       | 2016                                                        |       |
|----------|---------------------------------------------------------------------------|------|----------------------------------------------------------------------------|------|----------------------------------------------------------------------------|------|-------------------------------------------------------------|-------|-------------------------------------------------------------|-------|----------------------------------------------------------------------------|-------|-------------------------------------------------------------|-------|
|          | Dx                                                                        | %    | Dx                                                                         | %    | Dx                                                                         | %    | Dx                                                          | %     | Dx                                                          | %     | Dx                                                                         | %     | Dx                                                          | %     |
| 1        | 871: SEPTICEMIA OR SEVERE SEPSIS W/O MV >96 HOURS W MCC                   | 6.7% | 871: SEPTICEMIA OR SEVERE SEPSIS W/O MV >96 HOURS W MCC                    | 7.5% | 871: SEPTICEMIA OR SEVERE SEPSIS W/O MV >96 HOURS W MCC                    | 8.3% | 871: SEPTICEMIA OR SEVERE SEPSIS W/O MV >96 HOURS W MCC     | 10.2% | 871: SEPTICEMIA OR SEVERE SEPSIS W/O MV >96 HOURS W MCC     | 11.6% | 871: SEPTICEMIA OR SEVERE SEPSIS W/O MV >96 HOURS W MCC                    | 13.3% | 871: SEPTICEMIA OR SEVERE SEPSIS W/O MV >96 HOURS W MCC     | 14.3% |
| 2        | 291: HEART FAILURE & SHOCK W MCC                                          | 5.9% | 291: HEART FAILURE & SHOCK W MCC                                           | 5.8% | 291: HEART FAILURE & SHOCK W MCC                                           | 6.4% | 291: HEART FAILURE & SHOCK W MCC                            | 7.2%  | 291: HEART FAILURE & SHOCK W MCC                            | 8.0%  | 291: HEART FAILURE & SHOCK W MCC                                           | 8.5%  | 291: HEART FAILURE & SHOCK W MCC                            | 10.0% |
| 3        | 292: HEART FAILURE & SHOCK W CC                                           | 4.5% | 292: HEART FAILURE & SHOCK W CC                                            | 4.9% | 292: HEART FAILURE & SHOCK W CC                                            | 5.0% | 292: HEART FAILURE & SHOCK W CC                             | 4.6%  | 292: HEART FAILURE & SHOCK W CC                             | 4.8%  | 292: HEART FAILURE & SHOCK W CC                                            | 4.5%  | 292: HEART FAILURE & SHOCK W CC                             | 4.1%  |
| 4        | 392: ESOPHAGITIS, GASTROENT & MISC DIGEST DISORDERS W/O MCC               | 3.6% | 392: ESOPHAGITIS, GASTROENT & MISC DIGEST DISORDERS W/O MCC                | 3.8% | 392: ESOPHAGITIS, GASTROENT & MISC DIGEST DISORDERS W/O MCC                | 3.4% | 392: ESOPHAGITIS, GASTROENT & MISC DIGEST DISORDERS W/O MCC | 3.1%  | 392: ESOPHAGITIS, GASTROENT & MISC DIGEST DISORDERS W/O MCC | 3.0%  | 392: ESOPHAGITIS, GASTROENT & MISC DIGEST DISORDERS W/O MCC                | 2.5%  | 392: ESOPHAGITIS, GASTROENT & MISC DIGEST DISORDERS W/O MCC | 2.3%  |
| 5        | 313: CHEST PAIN                                                           | 2.7% | 313: CHEST PAIN                                                            | 2.6% | 378: G.I. HEMORRHAGE W CC                                                  | 2.2% | 885: PSYCHOSES                                              | 2.3%  | 309: CARDIAC ARRHYTHMIA & CONDUCTION DISORDERS W CC         | 2.2%  | 309: CARDIAC ARRHYTHMIA & CONDUCTION DISORDERS W CC                        | 2.1%  | 683: RENAL FAILURE W CC                                     | 1.9%  |
| 6        | 885: PSYCHOSES                                                            | 2.4% | 885: PSYCHOSES                                                             | 2.3% | 683: RENAL FAILURE W CC                                                    | 2.2% | 683: RENAL FAILURE W CC                                     | 2.3%  | 683: RENAL FAILURE W CC                                     | 2.1%  | 683: RENAL FAILURE W CC                                                    | 2.0%  | 309: CARDIAC ARRHYTHMIA & CONDUCTION DISORDERS W CC         | 1.9%  |
| 7        | 641: MISC DISORDERS OF NUTRITION, METABOLISM, FLUIDS/ELECTROLYTES W/O MCC | 2.2% | 309: CARDIAC ARRHYTHMIA & CONDUCTION DISORDERS W CC                        | 2.2% | 313: CHEST PAIN                                                            | 2.1% | 309: CARDIAC ARRHYTHMIA & CONDUCTION DISORDERS W CC         | 2.3%  | 378: G.I. HEMORRHAGE W CC                                   | 2.0%  | 378: G.I. HEMORRHAGE W CC                                                  | 1.8%  | 682: RENAL FAILURE W MCC                                    | 1.8%  |
| 8        | 603: CELLULITIS W/O MCC                                                   | 2.0% | 641: MISC DISORDERS OF NUTRITION, METABOLISM, FLUIDS/ ELECTROLYTES W/O MCC | 2.2% | 641: MISC DISORDERS OF NUTRITION, METABOLISM, FLUIDS/ ELECTROLYTES W/O MCC | 2.0% | 378: G.I. HEMORRHAGE W CC                                   | 2.1%  | 885: PSYCHOSES                                              | 1.9%  | 872: SEPTICEMIA OR SEVERE SEPSIS W/O MV >96 HOURS W/O MCC                  | 1.8%  | 872: SEPTICEMIA OR SEVERE SEPSIS W/O MV >96 HOURS W/O MCC   | 1.7%  |
| 9        | 309: CARDIAC ARRHYTHMIA & CONDUCTION DISORDERS W CC                       | 1.9% | 683: RENAL FAILURE W CC                                                    | 1.9% | 309: CARDIAC ARRHYTHMIA & CONDUCTION DISORDERS W CC                        | 2.0% | 313: CHEST PAIN                                             | 1.9%  | 308: CARDIAC ARRHYTHMIA & CONDUCTION DISORDERS W MCC        | 1.8%  | 682: RENAL FAILURE W MCC                                                   | 1.7%  | 308: CARDIAC ARRHYTHMIA & CONDUCTION DISORDERS W MCC        | 1.6%  |
| 10       | 312: SYNCOPE & COLLAPSE                                                   | 1.9% | 603: CELLULITIS W/O MCC                                                    | 1.9% | 885: PSYCHOSES                                                             | 2.0% | 603: CELLULITIS W/O MCC                                     | 1.8%  | 682: RENAL FAILURE W MCC                                    | 1.7%  | 641: MISC DISORDERS OF NUTRITION, METABOLISM, FLUIDS/ ELECTROLYTES W/O MCC | 1.7%  | 885: PSYCHOSES                                              | 1.6%  |

Appendix Table 9: Naïve, partial, and fully adjusted multilevel multinomial logistic regression models of readmission with hospital level random intercepts, by HRRP criteria for COPD versus non-COPD readmissions

| <b>Model Info</b>                           | <b>Naïve Model</b>                         |                                        | <b>Patient Covariates</b>                  |                                        | <b>Fully Adjusted</b>                      |                                        |
|---------------------------------------------|--------------------------------------------|----------------------------------------|--------------------------------------------|----------------------------------------|--------------------------------------------|----------------------------------------|
| N                                           | 1,662,983                                  |                                        | 1,659,576                                  |                                        | 1,658,372                                  |                                        |
| LL                                          | -2,128,251.5                               |                                        | -2,114,269.5                               |                                        | -2,105,502.3                               |                                        |
| df                                          | 5                                          |                                        | 43                                         |                                        | 81                                         |                                        |
| AIC                                         | 4,256,513.0                                |                                        | 4,228,625.0                                |                                        | 4,211,166.5                                |                                        |
| BIC                                         | 4,256,574.5                                |                                        | 4,229,155.0                                |                                        | 4,212,164.5                                |                                        |
| <b>Predictors</b>                           | <b>Non-COPD<br/>ref=Not<br/>Readmitted</b> | <b>COPD<br/>ref=Not<br/>Readmitted</b> | <b>Non-COPD<br/>ref=Not<br/>Readmitted</b> | <b>COPD<br/>ref=Not<br/>Readmitted</b> | <b>Non-COPD<br/>ref=Not<br/>Readmitted</b> | <b>COPD<br/>ref=Not<br/>Readmitted</b> |
| <b>Elixhauser (per ½ SD)</b>                | *1.22<br>(1.22, 1.23)                      | *1.06<br>(1.06, 1.06)                  | *1.21<br>(1.21, 1.21)                      | *1.06<br>(1.05, 1.06)                  | *1.19<br>(1.19, 1.19)                      | *1.04<br>(1.04, 1.05)                  |
| <b>Year (ref=2010)</b>                      |                                            |                                        |                                            |                                        |                                            |                                        |
| 2011                                        |                                            |                                        | 0.98<br>(0.96, 1.01)                       | 1.01<br>(0.98, 1.04)                   | 0.98<br>(0.96, 1.01)                       | 1.00<br>(0.97, 1.03)                   |
| 2012                                        |                                            |                                        | *0.94<br>(0.91, 0.97)                      | *0.97<br>(0.94, 1.00)                  | *0.94<br>(0.92, 0.97)                      | *0.96<br>(0.93, 0.99)                  |
| 2013                                        |                                            |                                        | *0.90<br>(0.87, 0.92)                      | *0.93<br>(0.90, 0.96)                  | *0.90<br>(0.88, 0.93)                      | *0.92<br>(0.89, 0.95)                  |
| 2014                                        |                                            |                                        | *0.88<br>(0.85, 0.90)                      | *0.91<br>(0.88, 0.94)                  | *0.86<br>(0.84, 0.88)                      | *0.92<br>(0.89, 0.95)                  |
| 2015                                        |                                            |                                        | *0.85<br>(0.83, 0.87)                      | *0.87<br>(0.84, 0.89)                  | *0.86<br>(0.84, 0.89)                      | *0.85<br>(0.82, 0.87)                  |
| 2016                                        |                                            |                                        | *0.84<br>(0.82, 0.87)                      | *0.88<br>(0.85, 0.90)                  | *0.85<br>(0.82, 0.87)                      | *0.86<br>(0.83, 0.88)                  |
| <b>Quarter (ref=1<sup>st</sup>)</b>         |                                            |                                        |                                            |                                        |                                            |                                        |
| 2 <sup>nd</sup> Quarter                     |                                            |                                        | *0.95<br>(0.94, 0.97)                      | *0.97<br>(0.96, 0.99)                  | *0.96<br>(0.94, 0.98)                      | *0.97<br>(0.96, 0.99)                  |
| 3 <sup>rd</sup> Quarter                     |                                            |                                        | *0.97<br>(0.96, 0.99)                      | *1.03<br>(1.01, 1.05)                  | *0.98<br>(0.96, 1.00)                      | *1.03<br>(1.01, 1.05)                  |
| 4 <sup>th</sup> Quarter                     |                                            |                                        | *0.95<br>(0.93, 0.97)                      | *1.02<br>(1.00, 1.04)                  | *0.96<br>(0.94, 0.98)                      | *1.02<br>(1.00, 1.04)                  |
| <b>Sex (ref=male)</b>                       |                                            |                                        |                                            |                                        |                                            |                                        |
| Female                                      |                                            |                                        | *0.94<br>(0.93, 0.95)                      | *0.92<br>(0.91, 0.94)                  | *0.92<br>(0.91, 0.93)                      | *0.91<br>(0.90, 0.93)                  |
| <b>Age (per 10 years)</b>                   |                                            |                                        |                                            |                                        |                                            |                                        |
|                                             |                                            |                                        | *1.10<br>(1.09, 1.11)                      | *0.90<br>(0.90, 0.91)                  | *1.06<br>(1.05, 1.07)                      | *0.89<br>(0.89, 0.90)                  |
| <b>Income Quartile (ref=1<sup>st</sup>)</b> |                                            |                                        |                                            |                                        |                                            |                                        |
| 2 <sup>nd</sup> Quartile                    |                                            |                                        | 1.00<br>(0.98, 1.02)                       | *0.97<br>(0.95, 0.99)                  | 0.99<br>(0.98, 1.01)                       | *0.97<br>(0.95, 0.98)                  |
| 3 <sup>rd</sup> Quartile                    |                                            |                                        | 0.99<br>(0.98, 1.01)                       | *0.97<br>(0.95, 0.99)                  | 0.99<br>(0.97, 1.00)                       | *0.95<br>(0.93, 0.97)                  |
| 4 <sup>th</sup> Quartile                    |                                            |                                        | 1.00<br>(0.97, 1.02)                       | *0.94<br>(0.91, 0.96)                  | 0.98<br>(0.96, 1.00)                       | *0.91<br>(0.89, 0.94)                  |
| Missing                                     |                                            |                                        | 0.95<br>(0.90, 1.00)                       | 0.99<br>(0.94, 1.05)                   | *0.95<br>(0.90, 1.00)                      | 0.99<br>(0.94, 1.05)                   |
| <b>Payer (ref=Medicare)</b>                 |                                            |                                        |                                            |                                        |                                            |                                        |
| Medicaid                                    |                                            |                                        | *1.02<br>(1.00, 1.05)                      | *1.10<br>(1.07, 1.12)                  | *1.03<br>(1.01, 1.06)                      | *1.10<br>(1.07, 1.12)                  |
| Private                                     |                                            |                                        | *0.74<br>(0.72, 0.76)                      | *0.64<br>(0.63, 0.66)                  | *0.76<br>(0.74, 0.78)                      | *0.65<br>(0.63, 0.67)                  |
| Self-Pay                                    |                                            |                                        | *0.60<br>(0.57, 0.63)                      | *0.60<br>(0.57, 0.63)                  | *0.62<br>(0.59, 0.65)                      | *0.62<br>(0.59, 0.65)                  |
| Other/No Charge                             |                                            |                                        | *0.76<br>(0.73, 0.79)                      | *0.80<br>(0.76, 0.83)                  | *0.77<br>(0.74, 0.80)                      | *0.81<br>(0.78, 0.85)                  |
| <b>Disposition (ref=Routine to home)</b>    |                                            |                                        |                                            |                                        |                                            |                                        |
| Post-acute care                             |                                            |                                        |                                            |                                        | *1.35                                      | 1.00                                   |

|                                                    |              |              |
|----------------------------------------------------|--------------|--------------|
|                                                    | (1.33, 1.38) | (0.98, 1.03) |
|                                                    | *1.19        | 0.92         |
| <i>Other</i>                                       | (1.11, 1.28) | (0.83, 1.01) |
|                                                    | *1.31        | *1.30        |
| <i>Home Health</i>                                 | (1.29, 1.34) | (1.27, 1.32) |
| <b>LOS (per day)</b>                               | *1.02        | *1.01        |
|                                                    | (1.01, 1.02) | (1.00, 1.01) |
| <b>Care intensity (ref=No)</b>                     |              |              |
| <i>Non-invasive ventilation</i>                    | *0.89        | *1.37        |
|                                                    | (0.87, 0.91) | (1.34, 1.40) |
| <i>Mechanical ventilation</i>                      | *0.79        | *0.87        |
|                                                    | (0.76, 0.81) | (0.84, 0.91) |
| <i>Tracheostomy</i>                                | 1.07         | 1.01         |
|                                                    | (1.00, 1.14) | (0.92, 1.10) |
| <i>Cardiac arrest</i>                              | *0.87        | *0.68        |
|                                                    | (0.77, 0.98) | (0.58, 0.81) |
| <i>CPR</i>                                         | 1.15         | 0.98         |
|                                                    | (0.98, 1.34) | (0.80, 1.21) |
| <b>Hospital ownership (ref=government)</b>         |              |              |
| <i>Private, non-profit</i>                         | *0.97        | 0.99         |
|                                                    | (0.95, 0.99) | (0.97, 1.01) |
| <i>Private, for-profit</i>                         | *1.05        | 1.01         |
|                                                    | (1.03, 1.08) | (0.98, 1.04) |
| <b>Hospital teaching status (ref=Non-teaching)</b> |              |              |
| <i>Teaching Hospital</i>                           | 0.98         | 1.02         |
|                                                    | (0.96, 1.00) | (1.00, 1.04) |
| <b>Hospital location (ref=Large metro area)</b>    |              |              |
| <i>Small metro area</i>                            | *0.94        | *0.93        |
|                                                    | (0.92, 0.95) | (0.91, 0.95) |
| <i>Micropolitan area</i>                           | *0.91        | *0.89        |
|                                                    | (0.88, 0.93) | (0.86, 0.92) |
| <i>Rural</i>                                       | *0.88        | *0.89        |
|                                                    | (0.85, 0.92) | (0.86, 0.93) |
| <b>Hospital Bed Size (ref=Small)</b>               |              |              |
| <i>Medium</i>                                      | 1.01         | 1.01         |
|                                                    | (0.98, 1.03) | (0.98, 1.03) |
| <i>Large</i>                                       | 1.01         | 1.00         |
|                                                    | (0.99, 1.04) | (0.98, 1.03) |
| <b>Annual Discharge (per 10k)</b>                  | *1.02        | 1.00         |
|                                                    | (1.01, 1.03) | (0.99, 1.02) |
| <b>Proportion Medicaid per 10%</b>                 | *0.99        | *1.01        |
|                                                    | (0.98, 1.00) | (1.00, 1.02) |



Appendix Table 10: Cox Regression models of COPD Readmission (versus reference of readmission for non-COPD diagnosis) by HRRP criteria with hospital level clustering

| Model Info                                            | Model 1           |       | Model 2           |       | Model 3           |       |
|-------------------------------------------------------|-------------------|-------|-------------------|-------|-------------------|-------|
| N                                                     | 287,884           |       | 287,362           |       | 287,186           |       |
| LL                                                    | -1,486,500.3      |       | -3,555,481.8      |       | -3,551,449.8      |       |
| df                                                    | 1                 |       | 20                |       | 39                |       |
| AIC                                                   | 2,973,002.5       |       | 7,111,003.5       |       | 7,102,977.5       |       |
| BIC                                                   | 2,973,013.3       |       | 7,111,214.5       |       | 7,103,390.0       |       |
| Predictors                                            | HR (95% CI)       | P     | HR (95% CI)       | P     | HR (95% CI)       | P     |
| <b>Elixhauser Index</b><br>(per 1/2 SD)               | 0.93 (0.93, 0.93) | <.001 | 0.93 (0.93, 0.93) | <.001 | 0.93 (0.93, 0.93) | <.001 |
| <b>Year</b> (ref=2010)                                |                   |       |                   |       |                   |       |
| 2011                                                  |                   |       | 1.01 (0.99, 1.04) | 0.380 | 1.01 (0.98, 1.04) | 0.487 |
| 2012                                                  |                   |       | 1.01 (0.98, 1.03) | 0.617 | 1.00 (0.98, 1.03) | 0.907 |
| 2013                                                  |                   |       | 1.00 (0.98, 1.03) | 0.693 | 1.00 (0.97, 1.02) | 0.763 |
| 2014                                                  |                   |       | 1.00 (0.97, 1.02) | 0.901 | 1.02 (0.99, 1.04) | 0.207 |
| 2015                                                  |                   |       | 0.99 (0.97, 1.02) | 0.449 | 0.97 (0.95, 1.00) | 0.045 |
| 2016                                                  |                   |       | 1.02 (1.00, 1.04) | 0.109 | 1.01 (0.98, 1.03) | 0.551 |
| <b>Quarter</b> (ref=1 <sup>st</sup> )                 |                   |       |                   |       |                   |       |
| 2 <sup>nd</sup> Quarter                               |                   |       | 0.99 (0.97, 1.00) | 0.086 | 0.98 (0.97, 1.00) | 0.033 |
| 3 <sup>rd</sup> Quarter                               |                   |       | 0.98 (0.96, 0.99) | 0.009 | 0.97 (0.96, 0.99) | 0.002 |
| 4 <sup>th</sup> Quarter                               |                   |       | 0.99 (0.97, 1.01) | 0.405 | 0.99 (0.97, 1.01) | 0.215 |
| <b>Sex</b> (ref=male)                                 |                   |       |                   |       |                   |       |
| Female                                                |                   |       | 0.98 (0.96, 0.99) | <.001 | 0.98 (0.97, 1.00) | 0.011 |
| <b>Age</b> (per 10 year)                              |                   |       | 0.91 (0.90, 0.91) | <.001 | 0.92 (0.91, 0.93) | <.001 |
| <b>Income Quartile</b> (ref=1 <sup>st</sup> )         |                   |       |                   |       |                   |       |
| 2 <sup>nd</sup> Quartile                              |                   |       | 1.00 (0.98, 1.01) | 0.662 | 1.00 (0.98, 1.02) | 0.951 |
| 3 <sup>rd</sup> Quartile                              |                   |       | 0.99 (0.98, 1.01) | 0.484 | 1.00 (0.98, 1.02) | 0.831 |
| 4 <sup>th</sup> Quartile                              |                   |       | 0.99 (0.97, 1.01) | 0.227 | 0.99 (0.97, 1.01) | 0.502 |
| Missing                                               |                   |       | 1.02 (0.97, 1.07) | 0.398 | 1.03 (0.98, 1.08) | 0.299 |
| <b>Payer</b> (ref=Medicare)                           |                   |       |                   |       |                   |       |
| Medicaid                                              |                   |       | 1.02 (1.00, 1.04) | 0.083 | 1.01 (0.99, 1.03) | 0.300 |
| Private                                               |                   |       | 0.95 (0.92, 0.97) | <.001 | 0.94 (0.92, 0.96) | <.001 |
| Self-Pay                                              |                   |       | 0.97 (0.93, 1.01) | 0.160 | 0.97 (0.93, 1.01) | 0.173 |
| Other/No Charge                                       |                   |       | 1.03 (0.99, 1.07) | 0.140 | 1.03 (0.99, 1.07) | 0.182 |
| <b>Disposition</b> (ref=Routine to home)              |                   |       |                   |       |                   |       |
| Post-acute care                                       |                   |       |                   |       | 0.82 (0.81, 0.84) | <.001 |
| Other                                                 |                   |       |                   |       | 1.03 (0.93, 1.14) | 0.539 |
| Home Health                                           |                   |       |                   |       | 1.02 (1.00, 1.04) | 0.020 |
| <b>Length of stay</b> (per day)                       |                   |       |                   |       | 1.00 (0.99, 1.00) | <.001 |
| <b>Care intensity</b> (ref=No)                        |                   |       |                   |       |                   |       |
| Non-invasive ventilation                              |                   |       |                   |       | 1.23 (1.21, 1.26) | <.001 |
| Mechanical ventilation                                |                   |       |                   |       | 1.12 (1.08, 1.16) | <.001 |
| Tracheostomy                                          |                   |       |                   |       | 0.87 (0.81, 0.94) | <.001 |
| Cardiac arrest                                        |                   |       |                   |       | 0.97 (0.82, 1.14) | 0.692 |
| CPR                                                   |                   |       |                   |       | 0.93 (0.75, 1.14) | 0.459 |
| <b>Hospital ownership</b><br>(ref=government)         |                   |       |                   |       |                   |       |
| Private, non-profit                                   |                   |       |                   |       | 1.01 (0.99, 1.03) | 0.337 |
| Private, for-profit                                   |                   |       |                   |       | 1.00 (0.97, 1.02) | 0.721 |
| <b>Hospital teaching status</b><br>(ref=Non-teaching) |                   |       |                   |       |                   |       |
| Teaching Hospital                                     |                   |       |                   |       | 1.00 (0.98, 1.02) | 0.840 |
| <b>Hospital location</b><br>(ref=Large metro area)    |                   |       |                   |       |                   |       |
| Small metro area                                      |                   |       |                   |       | 1.00 (0.98, 1.02) | 0.966 |
| Micropolitan area                                     |                   |       |                   |       | 1.01 (0.98, 1.03) | 0.584 |

|                                                          |                   |       |
|----------------------------------------------------------|-------------------|-------|
| <i>Rural</i>                                             | 1.04 (1.00, 1.07) | 0.060 |
| <b>Hospital Bed Size (ref=Small)</b>                     |                   |       |
| <i>Medium</i>                                            | 0.98 (0.96, 1.01) | 0.156 |
| <i>Large</i>                                             | 0.97 (0.95, 0.99) | 0.008 |
| <b>Annual Discharge (per 10k)</b>                        | 1.00 (1.00, 1.01) | 0.375 |
| <b>Proportion hospital Medicaid patient days per 10%</b> | 1.01 (1.01, 1.02) | <.001 |

Note: Hazard Ratios with 95% Confidence Intervals Presented. \* denotes p <0.05

*Appendix Table 11: Naïve, partial, and fully adjusted multilevel multinomial logistic regression models of readmission with hospital level random intercepts, by DRG groupings of respiratory versus non-respiratory readmissions*

| <b>Model Info</b>                               | <b>Naïve Model</b>                                |                                               | <b>Patient Covariates</b>                         |                                               | <b>Fully Adjusted</b>                             |                                               |
|-------------------------------------------------|---------------------------------------------------|-----------------------------------------------|---------------------------------------------------|-----------------------------------------------|---------------------------------------------------|-----------------------------------------------|
| N                                               | 1,662,983                                         |                                               | 1,659,576                                         |                                               | 1,658,372                                         |                                               |
| LL                                              | -2,124,155.3                                      |                                               | -2,112,156.3                                      |                                               | -2,104,503.5                                      |                                               |
| df                                              | 5                                                 |                                               | 43                                                |                                               | 81                                                |                                               |
| AIC                                             | 4,248,320.5                                       |                                               | 4,224,398.5                                       |                                               | 4,209,169.0                                       |                                               |
| BIC                                             | 4,248,382.5                                       |                                               | 4,224,928.5                                       |                                               | 4,210,167.5                                       |                                               |
| <b>Predictors</b>                               | <b>Non-Respiratory<br/>ref=Not<br/>Readmitted</b> | <b>Respiratory<br/>ref=Not<br/>Readmitted</b> | <b>Non-Respiratory<br/>ref=Not<br/>Readmitted</b> | <b>Respiratory<br/>ref=Not<br/>Readmitted</b> | <b>Non-Respiratory<br/>ref=Not<br/>Readmitted</b> | <b>Respiratory<br/>ref=Not<br/>Readmitted</b> |
| <b>Elixhauser<br/>(per ½ SD)</b>                | *1.24<br>(1.24, 1.24)                             | *1.08<br>(1.08, 1.08)                         | *1.24<br>(1.24, 1.24)                             | *1.08<br>(1.08, 1.08)                         | *1.21<br>(1.21, 1.21)                             | *1.05<br>(1.05, 1.05)                         |
| <b>Year (ref=2010)</b>                          |                                                   |                                               |                                                   |                                               |                                                   |                                               |
| 2011                                            |                                                   |                                               | 0.98<br>(0.95, 1.02)                              | 1.00<br>(0.97, 1.03)                          | 0.99<br>(0.96, 1.02)                              | 1.00<br>(0.97, 1.02)                          |
| 2012                                            |                                                   |                                               | *0.95<br>(0.92, 0.98)                             | *0.95<br>(0.93, 0.98)                         | *0.95<br>(0.92, 0.98)                             | *0.95<br>(0.92, 0.98)                         |
| 2013                                            |                                                   |                                               | *0.91<br>(0.88, 0.94)                             | *0.92<br>(0.89, 0.94)                         | *0.91<br>(0.89, 0.94)                             | *0.91<br>(0.89, 0.94)                         |
| 2014                                            |                                                   |                                               | *0.89<br>(0.86, 0.92)                             | *0.89<br>(0.87, 0.92)                         | *0.87<br>(0.84, 0.90)                             | *0.90<br>(0.88, 0.92)                         |
| 2015                                            |                                                   |                                               | *0.88<br>(0.85, 0.91)                             | *0.84<br>(0.82, 0.86)                         | *0.89<br>(0.86, 0.92)                             | *0.83<br>(0.81, 0.86)                         |
| 2016                                            |                                                   |                                               | *0.88<br>(0.85, 0.91)                             | *0.84<br>(0.82, 0.86)                         | *0.88<br>(0.86, 0.91)                             | *0.83<br>(0.81, 0.85)                         |
| <b>Quarter (ref=1<sup>st</sup>)</b>             |                                                   |                                               |                                                   |                                               |                                                   |                                               |
| 2 <sup>nd</sup> Quarter                         |                                                   |                                               | *0.97<br>(0.95, 0.99)                             | *0.96<br>(0.94, 0.97)                         | *0.98<br>(0.96, 0.99)                             | *0.96<br>(0.94, 0.97)                         |
| 3 <sup>rd</sup> Quarter                         |                                                   |                                               | 1.00<br>(0.98, 1.02)                              | 1.00<br>(0.98, 1.02)                          | 1.00<br>(0.98, 1.02)                              | 1.00<br>(0.98, 1.02)                          |
| 4 <sup>th</sup> Quarter                         |                                                   |                                               | *0.98<br>(0.96, 1.00)                             | 0.99<br>(0.97, 1.01)                          | 0.98<br>(0.96, 1.00)                              | 0.99<br>(0.97, 1.01)                          |
| <b>Sex (ref=male)</b>                           |                                                   |                                               |                                                   |                                               |                                                   |                                               |
| Female                                          |                                                   |                                               | *0.98<br>(0.96, 0.99)                             | *0.90<br>(0.89, 0.92)                         | *0.95<br>(0.94, 0.97)                             | *0.89<br>(0.88, 0.90)                         |
| <b>Age (per 10 years)</b>                       |                                                   |                                               | *1.10<br>(1.09, 1.10)                             | *0.94<br>(0.94, 0.95)                         | *1.06<br>(1.05, 1.07)                             | *0.93<br>(0.92, 0.93)                         |
| <b>Income Quartile<br/>(ref=1<sup>st</sup>)</b> |                                                   |                                               |                                                   |                                               |                                                   |                                               |
| 2 <sup>nd</sup> Quartile                        |                                                   |                                               | 0.99<br>(0.97, 1.01)                              | *0.98<br>(0.96, 1.00)                         | 0.99<br>(0.97, 1.01)                              | *0.98<br>(0.96, 0.99)                         |
| 3 <sup>rd</sup> Quartile                        |                                                   |                                               | 0.99<br>(0.97, 1.01)                              | *0.98<br>(0.96, 1.00)                         | *0.97<br>(0.95, 0.99)                             | *0.97<br>(0.95, 0.99)                         |
| 4 <sup>th</sup> Quartile                        |                                                   |                                               | 0.98<br>(0.96, 1.00)                              | *0.96<br>(0.94, 0.98)                         | *0.95<br>(0.93, 0.98)                             | *0.94<br>(0.92, 0.97)                         |
| Missing                                         |                                                   |                                               | 0.95<br>(0.89, 1.01)                              | 0.98<br>(0.94, 1.04)                          | 0.95<br>(0.89, 1.01)                              | 0.98<br>(0.94, 1.03)                          |
| <b>Payer (ref=Medicare)</b>                     |                                                   |                                               |                                                   |                                               |                                                   |                                               |
| Medicaid                                        |                                                   |                                               | 1.02<br>(0.99, 1.05)                              | *1.09<br>(1.07, 1.12)                         | 1.02<br>(1.00, 1.05)                              | *1.10<br>(1.08, 1.12)                         |
| Private                                         |                                                   |                                               | *0.72<br>(0.70, 0.74)                             | *0.68<br>(0.66, 0.69)                         | *0.74<br>(0.72, 0.76)                             | *0.69<br>(0.67, 0.71)                         |
| Self-Pay                                        |                                                   |                                               | *0.59<br>(0.56, 0.62)                             | *0.61<br>(0.59, 0.63)                         | *0.60<br>(0.57, 0.64)                             | *0.63<br>(0.61, 0.66)                         |
| Other/No Charge                                 |                                                   |                                               | *0.76<br>(0.73, 0.80)                             | *0.79<br>(0.76, 0.82)                         | *0.77<br>(0.73, 0.81)                             | *0.81<br>(0.78, 0.84)                         |

|                                                    |                       |                       |
|----------------------------------------------------|-----------------------|-----------------------|
| <b>Disposition</b><br>(ref=Routine to home)        |                       |                       |
| <i>Post-acute care</i>                             | *1.30<br>(1.28, 1.33) | *1.12<br>(1.10, 1.15) |
| <i>Other</i>                                       | *1.17<br>(1.08, 1.27) | 1.00<br>(0.92, 1.08)  |
| <i>Home Health</i>                                 | *1.31<br>(1.29, 1.34) | *1.30<br>(1.28, 1.32) |
| <b>LOS (per day)</b>                               | *1.02<br>(1.01, 1.02) | *1.01<br>(1.01, 1.01) |
| <b>Care intensity</b><br>(ref=No)                  |                       |                       |
| <i>Non-invasive ventilation</i>                    | *0.89<br>(0.87, 0.92) | *1.25<br>(1.22, 1.28) |
| <i>Mechanical ventilation</i>                      | *0.80<br>(0.77, 0.83) | *0.84<br>(0.81, 0.86) |
| <i>Tracheostomy</i>                                | *0.91<br>(0.84, 0.98) | *1.17<br>(1.09, 1.26) |
| <i>Cardiac arrest</i>                              | 0.92<br>(0.81, 1.04)  | *0.69<br>(0.60, 0.80) |
| <i>CPR</i>                                         | *1.21<br>(1.03, 1.43) | 0.96<br>(0.79, 1.15)  |
| <b>Hospital ownership</b><br>(ref=government)      |                       |                       |
| <i>Private, non-profit</i>                         | 0.98<br>(0.95, 1.00)  | 0.98<br>(0.96, 1.00)  |
| <i>Private, for-profit</i>                         | *1.09<br>(1.06, 1.13) | 0.99<br>(0.97, 1.02)  |
| <b>Hospital teaching status</b> (ref=Non-teaching) |                       |                       |
| <i>Teaching Hospital</i>                           | 0.98<br>(0.96, 1.00)  | 1.01<br>(1.00, 1.03)  |
| <b>Hospital location</b><br>(ref=Large metro area) |                       |                       |
| <i>Small metro area</i>                            | *0.92<br>(0.90, 0.93) | *0.95<br>(0.93, 0.96) |
| <i>Micropolitan area</i>                           | *0.86<br>(0.83, 0.89) | *0.93<br>(0.90, 0.95) |
| <i>Rural</i>                                       | *0.83<br>(0.80, 0.87) | *0.92<br>(0.89, 0.96) |
| <b>Hospital Bed Size</b> (ref=Small)               |                       |                       |
| <i>Medium</i>                                      | *1.03<br>(1.01, 1.06) | 0.99<br>(0.97, 1.01)  |
| <i>Large</i>                                       | *1.04<br>(1.01, 1.07) | 0.99<br>(0.97, 1.01)  |
| <b>Annual Discharge (per 10k)</b>                  | *1.03<br>(1.01, 1.04) | 1.00<br>(0.99, 1.02)  |
| <b>Proportion Medicaid per 10%</b>                 | 1.00<br>(0.99, 1.01)  | 1.00<br>(0.99, 1.01)  |

Appendix Table 12: Multilevel multinomial logistic regression models of readmission using only covariates with hospital level random intercept.

| <b>Model Info</b>                           | <b>Model 2</b>                             |                                        | <b>Model 3</b>                             |                                        |
|---------------------------------------------|--------------------------------------------|----------------------------------------|--------------------------------------------|----------------------------------------|
| N                                           | 1,659,576                                  |                                        | 1,658,372                                  |                                        |
| LL                                          | -2,139,461.8                               |                                        | -2,123,613.0                               |                                        |
| df                                          | 41                                         |                                        | 79                                         |                                        |
| AIC                                         | 4,279,005.5                                |                                        | 4,247,384.0                                |                                        |
| BIC                                         | 4,279,510.5                                |                                        | 4,248,357.0                                |                                        |
| <b>Predictors</b>                           | <b>Non-COPD<br/>ref=Not<br/>Readmitted</b> | <b>COPD<br/>ref=Not<br/>Readmitted</b> | <b>Non-COPD<br/>ref=Not<br/>Readmitted</b> | <b>COPD<br/>ref=Not<br/>Readmitted</b> |
| <b>Year (ref=2010)</b>                      |                                            |                                        |                                            |                                        |
| 2011                                        | 0.990<br>(0.964, 1.017)                    | 1.008<br>(0.978, 1.040)                | 0.992<br>(0.966, 1.018)                    | 1.005<br>(0.975, 1.036)                |
| 2012                                        | *0.962<br>(0.936, 0.989)                   | 0.975<br>(0.946, 1.005)                | *0.961<br>(0.936, 0.988)                   | *0.965<br>(0.936, 0.994)               |
| 2013                                        | *0.937<br>(0.913, 0.962)                   | *0.943<br>(0.915, 0.972)               | *0.934<br>(0.910, 0.959)                   | *0.929<br>(0.902, 0.957)               |
| 2014                                        | *0.931<br>(0.907, 0.956)                   | *0.924<br>(0.897, 0.952)               | *0.932<br>(0.908, 0.958)                   | *0.936<br>(0.909, 0.964)               |
| 2015                                        | *0.915<br>(0.892, 0.940)                   | *0.881<br>(0.855, 0.908)               | *0.916<br>(0.892, 0.940)                   | *0.858<br>(0.833, 0.884)               |
| 2016                                        | *0.921<br>(0.897, 0.946)                   | *0.897<br>(0.871, 0.924)               | *0.918<br>(0.895, 0.943)                   | *0.869<br>(0.845, 0.895)               |
| <b>Quarter (ref=1<sup>st</sup>)</b>         |                                            |                                        |                                            |                                        |
| 2 <sup>nd</sup> Quarter                     | *0.963<br>(0.947, 0.979)                   | *0.976<br>(0.958, 0.994)               | *0.969<br>(0.952, 0.985)                   | *0.976<br>(0.958, 0.994)               |
| 3 <sup>rd</sup> Quarter                     | 0.994<br>(0.977, 1.012)                    | *1.035<br>(1.016, 1.055)               | 1.000<br>(0.983, 1.018)                    | *1.034<br>(1.015, 1.054)               |
| 4 <sup>th</sup> Quarter                     | *0.967<br>(0.949, 0.985)                   | *1.026<br>(1.006, 1.047)               | *0.978<br>(0.960, 0.997)                   | *1.027<br>(1.007, 1.048)               |
| <b>Sex (ref=male)</b>                       |                                            |                                        |                                            |                                        |
| Female                                      | *0.905<br>(0.894, 0.916)                   | *0.916<br>(0.903, 0.929)               | *0.880<br>(0.869, 0.891)                   | *0.905<br>(0.893, 0.918)               |
| <b>Age (per 10 years)</b>                   |                                            |                                        |                                            |                                        |
|                                             | *1.128<br>(1.121, 1.136)                   | *0.909<br>(0.902, 0.915)               | *1.075<br>(1.067, 1.082)                   | *0.896<br>(0.890, 0.902)               |
| <b>Income Quartile (ref=1<sup>st</sup>)</b> |                                            |                                        |                                            |                                        |
| 2 <sup>nd</sup> Quartile                    | 0.990<br>(0.973, 1.007)                    | *0.967<br>(0.949, 0.985)               | 0.984<br>(0.967, 1.001)                    | *0.964<br>(0.946, 0.983)               |
| 3 <sup>rd</sup> Quartile                    | 0.989<br>(0.971, 1.007)                    | *0.961<br>(0.941, 0.980)               | *0.971<br>(0.953, 0.989)                   | *0.949<br>(0.929, 0.969)               |
| 4 <sup>th</sup> Quartile                    | 0.984<br>(0.964, 1.006)                    | *0.933<br>(0.910, 0.956)               | *0.952<br>(0.930, 0.974)                   | *0.912<br>(0.889, 0.936)               |
| Missing                                     | *0.932<br>(0.885, 0.981)                   | 0.991<br>(0.937, 1.047)                | *0.932<br>(0.885, 0.981)                   | 0.994<br>(0.940, 1.051)                |
| <b>Payer (ref=Medicare)</b>                 |                                            |                                        |                                            |                                        |
| Medicaid                                    | 1.019<br>(0.996, 1.043)                    | *1.092<br>(1.067, 1.117)               | *1.032<br>(1.008, 1.056)                   | *1.096<br>(1.071, 1.122)               |
| Private                                     | *0.673<br>(0.656, 0.691)                   | *0.626<br>(0.608, 0.644)               | *0.708<br>(0.690, 0.726)                   | *0.642<br>(0.624, 0.661)               |
| Self-Pay                                    | *0.516<br>(0.492, 0.542)                   | *0.575<br>(0.550, 0.601)               | *0.560<br>(0.533, 0.588)                   | *0.603<br>(0.577, 0.630)               |
| Other/No Charge                             | *0.716<br>(0.687, 0.747)                   | *0.784<br>(0.750, 0.819)               | *0.739<br>(0.708, 0.771)                   | *0.804<br>(0.770, 0.840)               |
| <b>Disposition (ref=Routine to home)</b>    |                                            |                                        |                                            |                                        |

|                                                          |                |                |
|----------------------------------------------------------|----------------|----------------|
|                                                          | *1.577         | *1.040         |
| <i>Post-acute care</i>                                   | (1.546, 1.609) | (1.015, 1.065) |
|                                                          | *1.361         | 0.949          |
| <i>Other</i>                                             | (1.267, 1.462) | (0.862, 1.045) |
|                                                          | *1.454         | *1.328         |
| <i>Home Health</i>                                       | (1.430, 1.479) | (1.305, 1.352) |
| <b>Length of Stay (per day)</b>                          | *1.026         | *1.010         |
|                                                          | (1.024, 1.029) | (1.008, 1.012) |
| <b>Care intensity (ref=No)</b>                           |                |                |
| <i>Non-invasive ventilation</i>                          | 0.999          | *1.407         |
|                                                          | (0.976, 1.023) | (1.375, 1.440) |
| <i>Mechanical ventilation</i>                            | 1.022          | *0.920         |
|                                                          | (0.988, 1.057) | (0.885, 0.956) |
| <i>Tracheostomy</i>                                      | 1.010          | 0.997          |
|                                                          | (0.941, 1.083) | (0.913, 1.089) |
| <i>Cardiac arrest</i>                                    | 0.908          | *0.691         |
|                                                          | (0.801, 1.029) | (0.586, 0.814) |
| <i>CPR</i>                                               | 1.160          | 0.986          |
|                                                          | (0.990, 1.360) | (0.802, 1.212) |
| <b>Hospital ownership (ref=government)</b>               |                |                |
| <i>Private, non-profit</i>                               | 1.002          | 0.999          |
|                                                          | (0.980, 1.025) | (0.974, 1.024) |
| <i>Private, for-profit</i>                               | *1.055         | 1.007          |
|                                                          | (1.028, 1.083) | (0.979, 1.035) |
| <b>Hospital teaching status (ref=Non-teaching)</b>       |                |                |
| <i>Teaching Hospital</i>                                 | 1.013          | *1.025         |
|                                                          | (0.995, 1.032) | (1.004, 1.047) |
| <b>Hospital location (ref=Large metro area)</b>          |                |                |
| <i>Small metro area</i>                                  | *0.929         | *0.930         |
|                                                          | (0.915, 0.944) | (0.913, 0.948) |
| <i>Micropolitan area</i>                                 | *0.876         | *0.883         |
|                                                          | (0.852, 0.900) | (0.858, 0.910) |
| <i>Rural</i>                                             | *0.828         | *0.881         |
|                                                          | (0.797, 0.860) | (0.844, 0.919) |
| <b>Hospital Bed Size (ref=Small)</b>                     |                |                |
| <i>Medium</i>                                            | *1.025         | 1.014          |
|                                                          | (1.002, 1.048) | (0.989, 1.039) |
| <i>Large</i>                                             | *1.055         | 1.012          |
|                                                          | (1.030, 1.080) | (0.986, 1.038) |
| <b>Annual Discharge (per 10k)</b>                        | 1.010          | 1.004          |
|                                                          | (0.998, 1.022) | (0.993, 1.016) |
| <b>Proportion hospital Medicaid patient days per 10%</b> | *0.991         | *1.010         |
|                                                          | (0.983, 0.998) | (1.001, 1.018) |

Note: Odds Ratios with 95% Confidence Intervals presented. \* denotes p <0.05

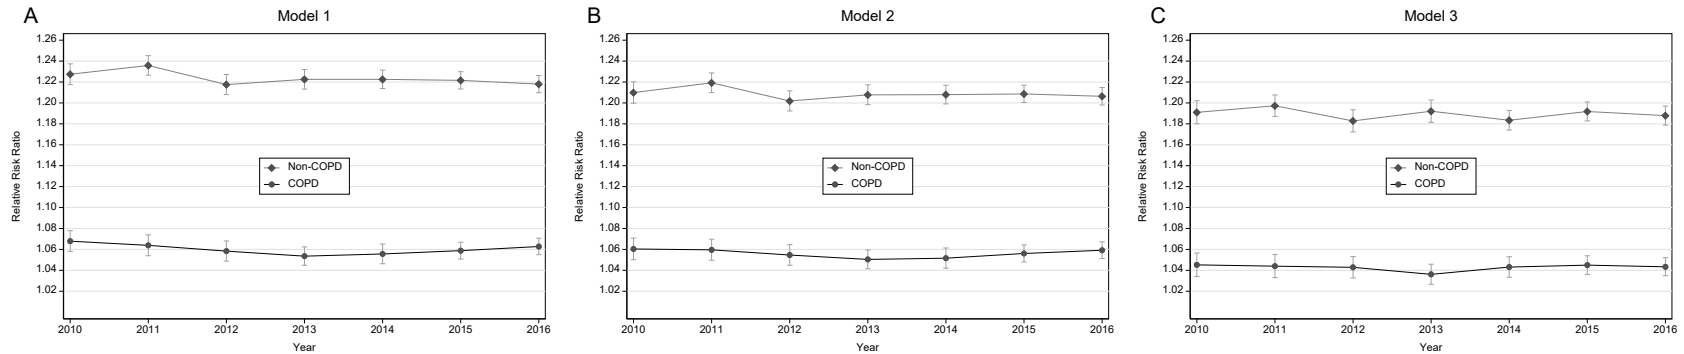

*Appendix Figure 2: Estimates for the effect of the Elixhauser Comorbidity Index (scaled to ½ standard deviation, approximately a 7.5 point change) over time on the risk of Non-COPD and COPD readmission. Point estimates with 95% confidence intervals are presented.*

*Appendix Table 13: Multilevel multinomial Elixhauser coefficients (Odds Ratio with 95% CI) over time*

|                         | 2010              | 2011              | 2012              | 2013              | 2014              | 2015              | 2016              |
|-------------------------|-------------------|-------------------|-------------------|-------------------|-------------------|-------------------|-------------------|
| <b>Non-COPD returns</b> |                   |                   |                   |                   |                   |                   |                   |
| Model 1                 | 1.23 (1.22, 1.24) | 1.24 (1.23, 1.25) | 1.22 (1.21, 1.23) | 1.22 (1.21, 1.23) | 1.22 (1.21, 1.23) | 1.22 (1.21, 1.23) | 1.22 (1.21, 1.23) |
| Model 2                 | 1.21 (1.20, 1.22) | 1.22 (1.21, 1.23) | 1.20 (1.19, 1.21) | 1.21 (1.20, 1.22) | 1.21 (1.20, 1.22) | 1.21 (1.20, 1.22) | 1.21 (1.20, 1.21) |
| Model 3                 | 1.19 (1.18, 1.20) | 1.20 (1.19, 1.21) | 1.18 (1.17, 1.19) | 1.19 (1.18, 1.20) | 1.18 (1.17, 1.19) | 1.19 (1.18, 1.20) | 1.19 (1.18, 1.20) |
| <b>COPD returns</b>     |                   |                   |                   |                   |                   |                   |                   |
| Model 1                 | 1.07 (1.06, 1.08) | 1.06 (1.05, 1.07) | 1.06 (1.05, 1.07) | 1.05 (1.04, 1.06) | 1.06 (1.05, 1.07) | 1.06 (1.05, 1.07) | 1.06 (1.05, 1.07) |
| Model 2                 | 1.06 (1.05, 1.07) | 1.06 (1.05, 1.07) | 1.05 (1.04, 1.06) | 1.05 (1.04, 1.06) | 1.05 (1.04, 1.06) | 1.06 (1.05, 1.06) | 1.06 (1.05, 1.07) |
| Model 3                 | 1.05 (1.03, 1.06) | 1.04 (1.03, 1.06) | 1.04 (1.03, 1.05) | 1.04 (1.03, 1.05) | 1.04 (1.03, 1.05) | 1.04 (1.04, 1.05) | 1.04 (1.03, 1.05) |

*Appendix Table 14: Multilevel multinomial logistic regression models of readmission with expanded inclusion criteria of age  $\geq 18$  years) with hospital level random intercept*

| <b>Model Info</b>                           | <b>Model 1</b>                             |                                        | <b>Model 2</b>                             |                                        | <b>Model 3</b>                             |                                        |
|---------------------------------------------|--------------------------------------------|----------------------------------------|--------------------------------------------|----------------------------------------|--------------------------------------------|----------------------------------------|
| N                                           | 1,682,629                                  |                                        | 1,679,169                                  |                                        | 1,677,941                                  |                                        |
| LL                                          | -2,149,924.5                               |                                        | -2,136,418.5                               |                                        | -2,127,514.0                               |                                        |
| df                                          | 5                                          |                                        | 43                                         |                                        | 81                                         |                                        |
| AIC                                         | 4,299,859.0                                |                                        | 4,272,923.0                                |                                        | 4,255,190.0                                |                                        |
| BIC                                         | 4,299,920.5                                |                                        | 4,273,453.0                                |                                        | 4,256,189.0                                |                                        |
| <b>Predictors</b>                           | <b>Non-COPD<br/>ref=Not<br/>Readmitted</b> | <b>COPD<br/>ref=Not<br/>Readmitted</b> | <b>Non-COPD<br/>ref=Not<br/>Readmitted</b> | <b>COPD<br/>ref=Not<br/>Readmitted</b> | <b>Non-COPD<br/>ref=Not<br/>Readmitted</b> | <b>COPD<br/>ref=Not<br/>Readmitted</b> |
| <b>Elixhauser Index<br/>(per 1/2 SD)</b>    | *1.21<br>(1.21, 1.24)                      | *1.05<br>(1.05, 1.08)                  | *1.21<br>(1.21, 1.21)                      | *1.05<br>(1.05, 1.05)                  | *1.18<br>(1.18, 1.18)                      | *1.05<br>(1.05, 1.05)                  |
| <b>Year (ref=2010)</b>                      |                                            |                                        |                                            |                                        |                                            |                                        |
| 2011                                        |                                            |                                        | 0.98<br>(0.95, 1.01)                       | 1.01<br>(0.98, 1.04)                   | 0.98<br>(0.96, 1.01)                       | 1.00<br>(0.97, 1.03)                   |
| 2012                                        |                                            |                                        | *0.94<br>(0.91, 0.97)                      | *0.97<br>(0.94, 1.00)                  | *0.94<br>(0.92, 0.97)                      | *0.96<br>(0.93, 0.99)                  |
| 2013                                        |                                            |                                        | *0.90<br>(0.87, 0.92)                      | *0.93<br>(0.90, 0.96)                  | *0.90<br>(0.88, 0.93)                      | *0.92<br>(0.90, 0.95)                  |
| 2014                                        |                                            |                                        | *0.88<br>(0.85, 0.90)                      | *0.91<br>(0.88, 0.93)                  | *0.86<br>(0.84, 0.88)                      | *0.92<br>(0.89, 0.95)                  |
| 2015                                        |                                            |                                        | *0.85<br>(0.83, 0.87)                      | *0.87<br>(0.84, 0.89)                  | *0.86<br>(0.84, 0.89)                      | *0.85<br>(0.82, 0.87)                  |
| 2016                                        |                                            |                                        | *0.84<br>(0.82, 0.87)                      | *0.88<br>(0.85, 0.90)                  | *0.85<br>(0.82, 0.87)                      | *0.86<br>(0.83, 0.88)                  |
| <b>Quarter (ref=1<sup>st</sup>)</b>         |                                            |                                        |                                            |                                        |                                            |                                        |
| 2 <sup>nd</sup> Quarter                     |                                            |                                        | *0.95<br>(0.94, 0.97)                      | *0.97<br>(0.96, 0.99)                  | *0.96<br>(0.94, 0.98)                      | *0.97<br>(0.96, 0.99)                  |
| 3 <sup>rd</sup> Quarter                     |                                            |                                        | *0.97<br>(0.95, 0.99)                      | *1.03<br>(1.01, 1.05)                  | *0.98<br>(0.96, 1.00)                      | *1.03<br>(1.01, 1.05)                  |
| 4 <sup>th</sup> Quarter                     |                                            |                                        | *0.95<br>(0.93, 0.97)                      | *1.02<br>(1.00, 1.04)                  | *0.96<br>(0.94, 0.97)                      | *1.02<br>(1.00, 1.04)                  |
| <b>Sex (ref=male)</b>                       |                                            |                                        |                                            |                                        |                                            |                                        |
| Female                                      |                                            |                                        | *0.94<br>(0.93, 0.95)                      | *0.92<br>(0.91, 0.94)                  | *0.92<br>(0.91, 0.93)                      | *0.91<br>(0.90, 0.93)                  |
| <b>Age (per 10 years)</b>                   |                                            |                                        | *1.09<br>(1.08, 1.10)                      | *0.92<br>(0.91, 0.93)                  | *1.05<br>(1.05, 1.06)                      | *0.91<br>(0.91, 0.92)                  |
| <b>Income Quartile (ref=1<sup>st</sup>)</b> |                                            |                                        |                                            |                                        |                                            |                                        |
| 2 <sup>nd</sup> Quartile                    |                                            |                                        | 1.00<br>(0.98, 1.02)                       | *0.97<br>(0.95, 0.99)                  | 1.00<br>(0.98, 1.01)                       | *0.96<br>(0.95, 0.98)                  |
| 3 <sup>rd</sup> Quartile                    |                                            |                                        | 1.00<br>(0.98, 1.01)                       | *0.96<br>(0.94, 0.98)                  | 0.99<br>(0.97, 1.00)                       | *0.95<br>(0.93, 0.97)                  |
| 4 <sup>th</sup> Quartile                    |                                            |                                        | 1.00<br>(0.98, 1.02)                       | *0.93<br>(0.91, 0.95)                  | 0.98<br>(0.96, 1.00)                       | *0.91<br>(0.89, 0.93)                  |
| Missing                                     |                                            |                                        | 0.96<br>(0.91, 1.01)                       | 0.99<br>(0.94, 1.05)                   | 0.95<br>(0.90, 1.00)                       | 0.99<br>(0.94, 1.05)                   |
| <b>Payer (ref=Medicare)</b>                 |                                            |                                        |                                            |                                        |                                            |                                        |
| Medicaid                                    |                                            |                                        | 1.02<br>(0.99, 1.04)                       | *1.10<br>(1.08, 1.13)                  | *1.03<br>(1.00, 1.05)                      | *1.10<br>(1.08, 1.13)                  |
| Private                                     |                                            |                                        | *0.74<br>(0.72, 0.75)                      | *0.65<br>(0.63, 0.67)                  | *0.75<br>(0.73, 0.77)                      | *0.66<br>(0.64, 0.68)                  |
| Self-Pay                                    |                                            |                                        | *0.60<br>(0.57, 0.63)                      | *0.60<br>(0.58, 0.63)                  | *0.62<br>(0.59, 0.65)                      | *0.62<br>(0.59, 0.65)                  |
| Other/No Charge                             |                                            |                                        | *0.76<br>(0.72, 0.79)                      | *0.80<br>(0.77, 0.84)                  | *0.77<br>(0.74, 0.80)                      | *0.82<br>(0.78, 0.85)                  |
| <b>Disposition (ref=Routine to home)</b>    |                                            |                                        |                                            |                                        |                                            |                                        |
| Post-acute care                             |                                            |                                        |                                            |                                        | *1.36<br>(1.33, 1.38)                      | 0.99<br>(0.97, 1.02)                   |



|                                                    |                       |                       |
|----------------------------------------------------|-----------------------|-----------------------|
| <i>Other</i>                                       | *1.20<br>(1.11, 1.28) | 0.91<br>(0.83, 1.01)  |
| <i>Home Health</i>                                 | *1.31<br>(1.29, 1.34) | *1.29<br>(1.27, 1.31) |
| <b>Length of stay (per day)</b>                    | *1.02<br>(1.01, 1.02) | *1.01<br>(1.00, 1.01) |
| <b>Care intensity (ref=No)</b>                     |                       |                       |
| <i>Non-invasive ventilation</i>                    | *0.89<br>(0.87, 0.91) | *1.38<br>(1.35, 1.41) |
| <i>Mechanical ventilation</i>                      | *0.78<br>(0.76, 0.81) | *0.87<br>(0.84, 0.91) |
| <i>Tracheostomy</i>                                | 1.07<br>(1.00, 1.14)  | 1.01<br>(0.93, 1.11)  |
| <i>Cardiac arrest</i>                              | *0.87<br>(0.77, 0.99) | *0.69<br>(0.58, 0.81) |
| <i>CPR</i>                                         | 1.14<br>(0.97, 1.33)  | 0.98<br>(0.80, 1.21)  |
| <b>Hospital ownership (ref=government)</b>         |                       |                       |
| <i>Private, non-profit</i>                         | *0.97<br>(0.95, 0.99) | 0.99<br>(0.96, 1.01)  |
| <i>Private, for-profit</i>                         | *1.06<br>(1.03, 1.08) | 1.01<br>(0.98, 1.04)  |
| <b>Hospital teaching status (ref=Non-teaching)</b> |                       |                       |
| <i>Teaching Hospital</i>                           | 0.98<br>(0.97, 1.00)  | 1.02<br>(1.00, 1.04)  |
| <b>Hospital location (ref=Large metro area)</b>    |                       |                       |
| <i>Small metro area</i>                            | *0.94<br>(0.92, 0.95) | *0.93<br>(0.91, 0.95) |
| <i>Micropolitan area</i>                           | *0.91<br>(0.88, 0.93) | *0.89<br>(0.87, 0.92) |
| <i>Rural</i>                                       | *0.88<br>(0.85, 0.92) | *0.90<br>(0.86, 0.93) |
| <b>Hospital Bed Size (ref=Small)</b>               |                       |                       |
| <i>Medium</i>                                      | 1.01<br>(0.98, 1.03)  | 1.01<br>(0.98, 1.03)  |
| <i>Large</i>                                       | 1.01<br>(0.99, 1.04)  | 1.00<br>(0.98, 1.03)  |
| <b>Annual Discharge (per 10k)</b>                  | *1.02<br>(1.01, 1.04) | 1.00<br>(0.99, 1.02)  |
| <b>Proportion Medicaid patient-days per 10%</b>    | *0.99<br>(0.98, 1.00) | *1.01<br>(1.00, 1.02) |

Note: Odds Ratios with 95% Confidence Intervals Presented. \* denotes  $p < 0.05$

## Supplemental References

1. HCUP Nationwide Readmissions Database (NRD). Agency for Healthcare Research and Quality; 2010-2016. <https://www.hcup-us.ahrq.gov/nrdoverview.jsp>.
2. Healthcare Cost and Utilization Project. Introduction to the HCUP Nationwide Readmissions Database (NRD) 2010-2016. Agency for Healthcare Research and Quality. [https://www.hcup-us.ahrq.gov/db/nation/nrd/Introduction\\_NRD\\_2010-2016.jsp](https://www.hcup-us.ahrq.gov/db/nation/nrd/Introduction_NRD_2010-2016.jsp). Published 2018. Updated August 2018. Accessed October 15, 2018.
3. Yale New Haven Health Services Corporation/Center for Outcomes Research & Evaluation. 2016 Condition-Specific Measures Updates and Specifications Report Hospital-Level 30-Day Risk-Standardized Readmission Measures. In. Baltimore, MD: Centers for Medicare & Medicaid Services; 2016.
4. Yale New Haven Health Services Corporation/Center for Outcomes Research & Evaluation. 2017 Condition-Specific Measures Updates and Specifications Report Hospital-Level 30-Day Risk-Standardized Readmission Measures. In. Baltimore, MD: Centers for Medicare & Medicaid Services; 2017.
5. Moore BJ, White S, Washington R, Coenen N, Elixhauser A. Identifying Increased Risk of Readmission and In-hospital Mortality Using Hospital Administrative Data: The AHRQ Elixhauser Comorbidity Index. *Med Care*. 2017;55(7):698-705.
6. *ELIXHAUSER: Stata module to calculate Elixhauser index of comorbidity* [computer program]. Boston College Department of Economics: Statistical Software Components; 2015.
7. Healthcare Cost and Utilization Project. HCUP Elixhauser Comorbidity Software. Agency for Healthcare Research and Quality,. [www.hcup-us.ahrq.gov/toolssoftware/comorbidity/comorbidity.jsp](http://www.hcup-us.ahrq.gov/toolssoftware/comorbidity/comorbidity.jsp). Published 2017. Accessed March 1, 2019.
